# Supplementary material for: The Huperzia selago Shoot Tip Transcriptome Sheds New Light on the Evolution of Leaves
Source: Oxford University Press journal article supplement (doi:10.1093/gbe/evx169), 2017-08-28

**Supplementary fig. S2. Blobtools analysis of the transcriptome. (A)** Mapping of reads to sequences from different organism classes, linked to GC contents. **(B)** Summary of results. Note that these results are based on raw reads, not on assembled contigs.

**A**

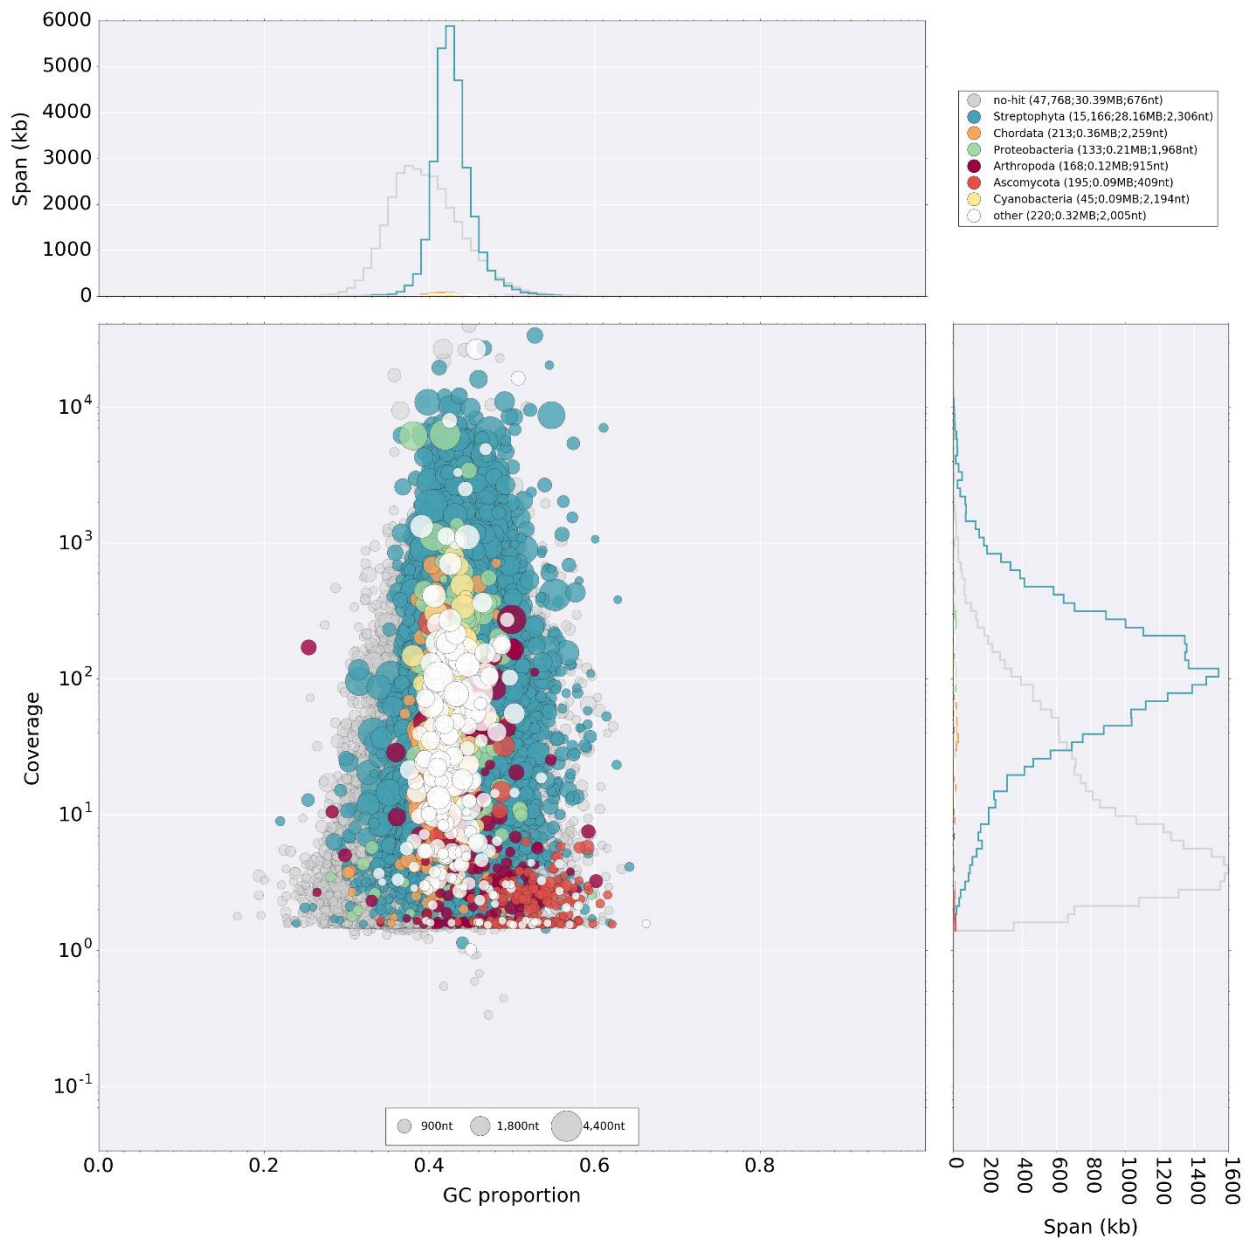

**B**

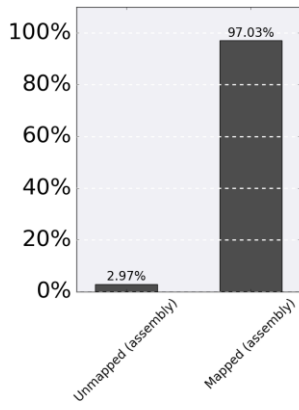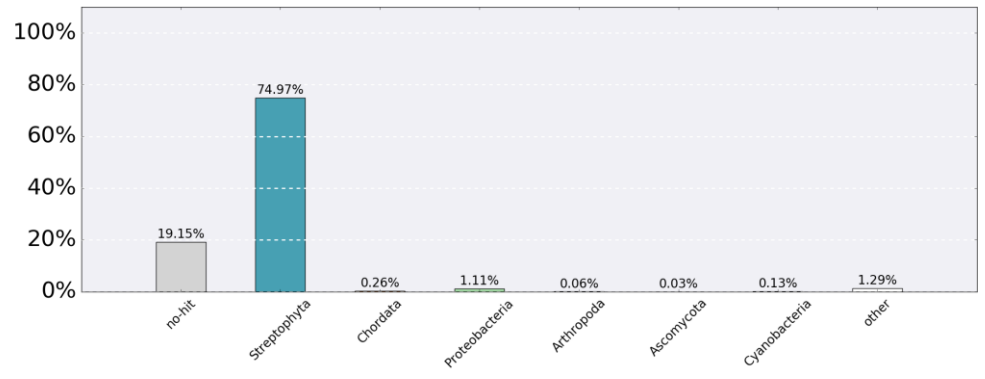

Supplement: evx169_suppfig_s2.pdf [file evx169_suppfig_s2.pdf]
