# Supplementary material for: The Huperzia selago Shoot Tip Transcriptome Sheds New Light on the Evolution of Leaves
Source: Oxford University Press journal article supplement (doi:10.1093/gbe/evx169), 2017-08-28
Supplement: evx169_supptable_s1.xlsx [file evx169_supptable_s1.xlsx]

## Sheet: Analysis of plant evolution
Supplementary table S1. Taxa included and GenBank accessions used for analysis of plant evolution.
Taxon	Classification	rps4	atpB	rbcL
Marchantia L.	Marchantiophyta	DQ220688	X04465	U87079
Plagiochila (Dumort.) Dumort.	Marchantiophyta	AY547718	DQ646035	AY699998
Pellia Raddi	Marchantiophyta	AY507457	DQ646048	AY688787
Mnium L.	Bryophyta	AF023796	DQ646071	U87082
Physcomitrella Bruch & Schimp.	Bryophyta	KP658914	DQ646069	X74156
Polytrichum Hedw.	Bryophyta	JX241475	JX241527	U87087
Rhytididadelphus (Limpr.) Warnst.	Bryophyta	AF143033	JN162161	JN162316
Sphagnum L.	Bryophyta	JX241483	JX241538	AF231887
Takakia S. Hatt. et Inoue	Bryophyta	AB299143	AB299148	AB427089
Tetraphis Hedw.	Bryophyta	AY908021	DQ646060	U87091
Anthoceros L.	Anthocerophyta	AB087443	AB086179	U87063
Phaeoceros Prosk.	Anthocerophyta	---	DQ646119	JX872446
Huperzia Bernh.	Lycopodiophyta	AF313605	U93819	Y07934
Huperzia selago (L.) Bernh. ex Schrank et Mart.	Lycopodiophyta	KX761189	KX761188	KX761187
Isoetes L.	Lycopodiophyta	AF313592	EU352261	AF404493
Lycopodium annotinum L.	Lycopodiophyta	AM777801	EU352262	AJ133247
Lycopodium clavatum L.	Lycopodiophyta	DQ026612	DQ646094	Y07936
Selaginella moellendorffii Hieron.	Lycopodiophyta	HM173080	HM173080	HM173080
Selaginella uncinata (Desv. ex Poir.) Spring	Lycopodiophyta	KR028168	AB197035	AB197035
Equisetum arvense L.	Equisetales	AJ583677	U93824	L11053
Equisetum ramosissimum Desf.	Equisetales	EU439173	EU439074	AB574688
Angiopteris Hoffm.	Marattiales	AF313591	X58429	L11052
Marattia Sw.	Marattiales	EU439134	EU439069	EU439090
Adiantum L.	Leptosporangiatae	AY612648	U93840	U05906
Asplenium L.	Leptosporangiatae	AY549807	EF463342	AB023503
Blechnum L.	Leptosporangiatae	AF533868	U93838	U05910
Dicksonia L'Her.	Leptosporangiatae	AF313596	U93829	U05919
Osmunda L.	Leptosporangiatae	EF588768	U93827	AB024948
Polypodium L.	Leptosporangiatae	X84137	EF463510	AB044899
Pteridium Gled. ex Scop.	Leptosporangiatae	AF197104	U93835	U05939
Vandenboschia Copel.	Leptosporangiatae	EU553544	U93828	U05948
Botrychium Sw.	Ophioglossales	AY870429	U93826	L13474
Ophioglossum L.	Ophioglossales	AF313594	U93825	AB024960
Psilotum Sw.	Psilotaceae	AF313588	U93822	U30835
Tmesipteris Bernh.	Psilotaceae	AF313593	U93823	U30836
Ephedra foeminea Forssk.	Gnetales	AY755829	AY056534	AY755784
Ephedra frustillata Miers	Gnetales	AY755820	AY056528	AY056570
Ephedra sinica Stapf	Gnetales	AY755826	AY056529	AY056565
Gnetum gnemon L.	Gnetales	AY755811	AF187060	L12680
Gnetum parvifolium (Warb.) W.C. Cheng	Gnetales	AY755813	AB295905	AY056577
Gnetum ula Brongn.	Gnetales	AF313610	AB715149	AY296568
Welwitschia Hook. f	Gnetales	AY188246	AJ235645	AJ235814
Acorus L.	Angiospermae	X84107	EU273602	D28865
Agave L.	Angiospermae	X84109	AF209521	AF206729
Amborella Baill.	Angiospermae	AY188227	AJ235389	L12628
Arabidopsis thaliana (L.) Heynh.	Angiospermae	AP000423	AP000423	AB917053
Austrobaileya C.T. White	Angiospermae	AF313613	AJ235403	L12632
Chloranthus Sw.	Angiospermae	AF313614	AF092113	L12640
Cinnamomum Schaeff.	Angiospermae	---	AJ235436	L12641
Drimys Forst.	Angiospermae	AY188231	DQ887676	L01905
Eucryphia Cav.	Angiospermae	EU002320	AF209584	L01918
Gunnera L.	Angiospermae	EU002325	AF093374	L11186
Hamamelis L.	Angiospermae	EF207541	AY263960	L01922
Illicium L.	Angiospermae	EF053218	U86385	L12652
Impatiens L.	Angiospermae	JF275952	AJ235503	Z83142
Lactoris Phil.	Angiospermae	---	AJ235515	L08763
Liquidambar L.	Angiospermae	EU002341	AF092104	M58394
Liriodendron L.	Angiospermae	AY832289	AJ235522	X54346
Lysimachia L.	Angiospermae	---	AF213778	U96654
Magnolia L.	Angiospermae	AY188233	AJ235526	AF206791
Myriophyllum L.	Angiospermae	EF207546	AJ235538	L11195
Nymphaea L.	Angiospermae	AY188228	AJ235544	M77034
Paeonia L.	Angiospermae	EF207531	AF209643	L13187
Piper L.	Angiospermae	AY832291	AJ235560	L12660
Platanus L.	Angiospermae	AY832292	AF528858	L01943
Plumbago L.	Angiospermae	EU002354	AJ235565	M77701
Polemonium L.	Angiospermae	---	AY725925	L11687
Ribes L.	Angiospermae	EF207551	AF528859	L11204
Sassafras J. Presl	Angiospermae	AY188236	AF209668	AF206819
Tetracarpaea Hook.	Angiospermae	---	AF209688	L11207
Tetracentron Oliv.	Angiospermae	KC608752	AF093422	L12668
Tragopogon L.	Angiospermae	GQ983938	AJ236197	L13647
Trochodendron Siebold et Zucc.	Angiospermae	EU002372	AF093423	L01958
Zingiber Boehm.	Angiospermae	JX088661	AF168953	L05465
Bowenia Hook.	Cycadophyta	AB645719	AY056520	L12671
Ceratozamia Brongn.	Cycadophyta	JQ770290	AY056522	AY056558
Cycas L.	Cycadophyta	EU016841	JN867588	L12674
Cycas revoluta Thunb.	Cycadophyta	AF313609	AY056518	AY056556
Dioon Lindl.	Cycadophyta	GQ204075	AF469658	AF531203
Encephalartos Lehm.	Cycadophyta	GQ204086	AY056519	L12676
Zamia sp. L.	Cycadophyta	GQ204095	AF188845	AF202959
Zamia pumila L.	Cycadophyta	AY188209	AY056521	AY056557
Araucaria Juss.	Cupressophyta	AY188260	AY056549	U96467
Calocedrus Kurz	Cupressophyta	AY188281	AB715250	L12569
Cephalotaxus Siebold et Zucc. ex Endl.	Cupressophyta	AY188264	DQ646112	AF227461
Chamaecyparis Spach	Cupressophyta	AY188283	AY056548	L12570
Cupressus L.	Cupressophyta	AY188282	AJ621925	L12571
Juniperus L.	Cupressophyta	AY188279	AY056546	L12573
Metasequoia Miki	Cupressophyta	AY188268	AJ235534	AJ235805
Phyllocladus Rich. ex Mirb.	Cupressophyta	AY188258	DQ646110	AB027315
Podocarpus Labill.	Cupressophyta	AY188252	AJ235567	AF307931
Sciadopitys Siebold et Zucc.	Cupressophyta	AY188262	AB645771	L25753
Sequoia Endl.	Cupressophyta	AY188266	AY056554	L25755
Taxodium Rich.	Cupressophyta	AY188270	AY664835	AF127427
Taxus L.	Cupressophyta	X84145	AJ235619	AJ235811
Thuja L.	Cupressophyta	AY188276	AY056545	L12578
Thujopsis Siebold et Zucc.	Cupressophyta	AY188277	AY056547	L12577
Ginkgo biloba L.	Ginkgophyta	AF313611	AJ235481	AJ235804
Abies Mill.	Pinaceae	AY188224	AY056551	AB029646
Cedrus Duham.	Pinaceae	AY188222	AY056550	X63662
Larix Mill.	Pinaceae	AB547960	AY056544	X63663
Picea A. Dietr.	Pinaceae	AY188226	AY056552	X75478
Pinus L.	Pinaceae	AF313612	AY056543	AB019798
Pseudotsuga Carrière	Pinaceae	AY188223	AY056540	X52937
Tsuga Carrière	Pinaceae	AY188220	AJ235632	AY056581

## Sheet: KNOX
Supplementary table S1. Sequences of proteins used in KNOX protein phylogeny (fig. 1, S1).
>VitVin|GSVIVT01019880001	MQEPGLGMMGGGGIGGLSDGDQQQRQLKGEIVTHPLYEQLLAAHVACLRVATPIDQLPLIDAQLTQSHHLLRSYASQQHHHGNSLSPHERQELDNFLSQYLLVLCTFKEQLQQHVRVHAVEAVMACREIEQTLQALTGVSLGEGSGATMSDDEEEMQMDFSLDQGGGDGHDMMGFGPLLPTESERTLMERVRQELKIELKQGFKSRIEDVREEILRKRRAGKLPGDTTSVLKNWWQQHSKWPYPTEDDKAKLVEETGLQLKQINNWFINQRKRNWHSNSQSVTALKSKRKR*
>OrySat|LOC_Os06g43860.1	MAFHYQDHALAMDAAAAAAETGGHHHPGFVGAGGVVGGGGGGGWEREKAAIAAHPLYERLLEAHVACLRVATPVDQLPRIDAQIAARPPPLAAATAAAAAAAAGGAPSGGEELDLFMTHYVLLLCSFKEQLQQHVRVHAMEAVMACWELEQTLQSLTGASPREGSGATMSDDEDNQVDSESNMFDGNDGSDGMGFGPLMLTEGERSLVERVRQELKHELKQGYREKLVDIREEILRKRRAGKLPGDTASTLKAWWQAHSKWPYPTEEDKARLVQETGLQLKQINNWFINQRKRNWHSNPASSSSDKSKRKRSNAGDGKAEQSW*
>PopTri|Potri.001G112200.1	MQEPNLGMMGSGSGGALGGLSSGEMSVSLSGDQSRQLKAEIATHPLYEQLLSAHVSCLRVATPIDQLPLIDAQLSQSHHLLRSYASQHNQHGHSLSPHERQDLDNFLAQYLIILCTFKDQLQQHVRVHAVEAVMACREIETTLQALTGVTLGEGTGATMSDDEDDLQMDFSLDQSSADGHDMMGFGPLLPTESERSLMERVRQELKIELKQGFKSRIEDVREEILRKRRAGKLPGDTTSVLKNWWQQHSKWPYPTEDDKAKLVEETGLQLKQINNWFINQRKRNWHSNSQSVTSLKSKRKR*
>ZeaMay|GRMZM2G017087_P02	MEEITQHFGVGASSHGHGHGQHHHHHHHHHPWASSLSAVVAPLPPQPPSAGLPLTLNTVAATGNSGGSGNPVLQLANGGGLLDACVKAKEPSSSSPYAGDVEAIKAKIISHPHYYSLLTAYLECNKVGAPPEVSARLTEIAQEVEARQRTALGGLAAATEPELDQFMEAYHEMLVKFREELTRPLQEAMEFMRRVESQLNSLSISGRSLRNILSSGSSEEDQEGSGGETELPEVDAHGVDQELKHHLLKKYSGYLSSLKQELSKKKKKGKLPKEARQQLLSWWDQHYKWPYPSETQKVALAESTGLDLKQINNWFINQRKRHWKPSEEMHHLMMDGYHTTNAFYMDGHFINDGGLYRLG*
>ZeaMay|GRMZM2G094241_P01	MEDLYSIHPGISRAGGAATAASEVSGVAGGPGSPPPPPSQPPPPPPADLTELVKAQIAGHPRYPSLLSAYIECRKVGAPPEVATLLEEIGRERCAAASAGGEVGLDPELDEFMEAYCRVLERYKEELSRPFDEAASFLSSVRTQLSSLCGAAASLSDEMVGSSEEDEACSGGDTEATEPGQQEHSSRLADRELKEMLLKKYSGCLSRLRSEFLKKRKKGKLPKDARSALMDWWNTHYRWPYPTEEDKVRLAAATGLDPKQINNWFINQRKRHWKPSEDMRFALMEGVTGGGPSSGTTLYFDTGTIGP*
>HupSel|comp61014_c0_seq2_3|KNOX2-3	QQQQQQQSPSAEIITGELYSQKQFLRPVEQERGSEDCKNMMGNLHCQPANNSDLLDGELAENEDHSCIWRNVRLKAEIVSHPLYDQLVTAHVACLRTATPVDQLPKIDAQLVNSSQITAKYAVLVNEQEFLTHEDKEELNRFMANYVFLLQSFKDQLQQHVRIHAMEAVVACWELEQALMNLTGVTPSEGMSATMSDDEDDYVNEQDLYDPAFDGHDMMGFGPLIPSETERTLMERVRHELKLELKQGYRARINDVREEILRKRRAGKLPGDTTSVLKSWWHAHSKWPYPSEEEKVKLVQETGLELKQINNWFINQRKRNWHNNPSASSMKNKR*
>VitVin|GSVIVT01007715001	MDQLYGLHSPSSSDYHHPPPFPPENLISPSHYPNFNSPAPFPIFGSDQLLSASSLVVSDAASMVAEIQGGGSGEEVSSAIRAKIATHPLYPKLLHAYIECQKVGAPPEVAYLLEEIRRGSELCRRNAVSTCLGADPELDEFMETYCDILVKYKSDLARPFDEATAFLNNIETQLNTLCNGASRSYVSDEAAGSSEEDLSGGEVEVQECLQTTENQELKDKLLRKYSGYISTLKHEFSKTKKKGKLPKEARQALLDWWNIHYKWPYPTEEDKIALAESTGLDQKQINNWFINQRKRHWKPSENMQFAVMDSIYGPFFMNE*
>ZeaMay|GRMZM2G002225_P01	MEVEEELPASADLTGGSKQATTTTPFYLALDHTASATSSPPPAAPLPCAANSERGSEIIKAKIMSHPLYPAVLRAFIDCRKVGAPPEIVGRLSALADDVEMNSDDKQEQRRAADPELDQFMEIYCHMLVRYRQELTRPIQEADEFFRSMEAQIDAFSLLDDNGYEGCGSSDEDEQEAVDLGGLSVLETGSPSGEDNELKNRLLNKYSGYLSNLWRELSRKKKKGKLPRDARQKLLHWWQLHYRWPYPSELEKAALAESTGLEAKQINNWFINQRKRHWKQAPPTMALATANYMLGPHDGGGSSSSASAAGLRVEEQYFTGGSSYPRGP*
>PopTri|Potri.010G043500.1	MDGTYGLHSTVADYSDKALMSPEDLILQSEYQSLLSSETLRLRIPILGSEELLSEAASIRTEEDMSALIKAKIASHPCYPRLLEAYIDCQKVGAPPGIACFLDEIRRENDLFKQDAVSTYWGADPELDEFMETYCDLLVKYKSDLERPFDEATTFLNKIEMQLRNLCTGASIRSISDEGAPSSDEELSGGELDMHEAQPSGEDRELKDKLLRRFGSHIGTLKLEFSKKKKKGKLPKEARQTLLGWWDAHYKWPYPTEADKIALAESTGLDQKQINNWFINQRKRHWKPSENLQFAVMDNLSGQFFTEDD*
>OstLuc|5313	SATDSEEMTLAVRAHPMYPRLVEAYYECRQIGAEGDVLEALDRERDAMLYSVQVMNEDASSSGGAHDVPQRDLDRFMRECTHELESYVKELHALYEDAKSCCRELETRARKVRSDVVKSADIRGEAAESKRRAPATAAEHAAASGDFDQILSNSQQRRDHEERLREALKRKYASSIMTLKSEFMRKRKKGKLPDQSTEVLKNWWSENIVWPYPTEDDKRELIAQTKLDATQVNNWFINFRKRHW
>OrySat|LOC_Os01g19694.1	MEDLYSIHPGISRVGGAASEASGVGVVVGGGGGSSSSDLTELMKAQIAGHPRYPTLLSAYIECRKVGAPPEVASLLKEIGRERRAGGGGGGAGQIGVDPELDEFMEAYCRVLVRYKEELSRPFDEAASFLSSIQTQLSNLCSGATSPPATTATHSDEMVGSSDEDQCSGETDMLDIGQEQSSRLADHELKEMLLKKYSGCLSRLRSEFLKKRKKGKLPKDARSALLEWWNTHYRWPYPTEEDKLRLAARTGLDPKQINNWFINQRKRHWKPSDGMRFALMEGVAGGSSGTTLYFDTGTIGP*
>VitVin|GSVIVT01009273001	MEDYNQLGENTTSRASFLYTSSVLAPNSSCFQSEAHPVVKTEASTSQHAQKFHYPIIRGHQTVDHQQQQQGNESFSEVEAIKAKIIAHPQYSNLLEAYMDCQKVGAPPEVVERLAAVRQEFESRQRSSVTCRDASKDPELDQFMEAYYDMLVKYREELTRPLQEATDFMRRIESQLNMLSNGPVRIFTSDEKCEGVGSSEEDQDNSGGETELPEIDPRAEDRELKNHLLRKYSGYLSSLKQELSKKKKKGKLPKDARQKLLNWWELHYKWPYPSETEKVALAETTGLDQKQINNWFINQRKRHWKPSEDMQFMVMDGLHPQNAALYMESHYMGDGAYRLGP*
>AraTha|AT5G11060.1	MAFHNNHFNHFTDQQQHQPPPPPQQQQQQHFQESAPPNWLLRSDNNFLNLHTAASAAATSSDSPSSAAANQWLSRSSSFLQRGNTANNNNNETSGDVIEDVPGGEESMIGEKKEAERWQNARHKAEILSHPLYEQLLSAHVACLRIATPVDQLPRIDAQLAQSQNVVAKYSTLEAAQGLLAGDDKELDHFMTHYVLLLCSFKEQLQQHVRVHAMEAVMACWEIEQSLQSFTGVSPGEGTGATMSEDEDEQVESDAHLFDGSLDGLGFGPLVPTESERSLMERVRQELKHELKQGYKEKIVDIREEILRKRRAGKLPGDTTSVLKSWWQSHSKWPYPTEEDKARLVQETGLQLKQINNWFINQRKRNWHSNPSSSTVSKNKRRSNAGENSGRDR
>PopTri|Potri.006G190000.1	MAFQDHHHTPQEMTFQLPQHHHLSASPSTGPTWLSNAVLRRHDDVLTQTRIEKPENNTNNGSEEELIDSVSDNWERAKCKAEILGHPLYEQLLAAHVACLRIATPVDQLARIDTQLAQSQDVVAKYSGVGRSHVVDEKELDQFMTHYVILLCSFKDQLQQHVRVHAMEAVMACWELEQSLQSLTGVSPGEGTGATMSDDDDDQADSDANLYDGNLDGLDTMGFGPLVPTETERSLMERVRQELKHELKQDYKEKIVDIREEILRKRRAGKLPGDTTSLLKAWWQTHSKWPYPTEEDKARLVQETGLQLKQINNWFINQRKRNWHSSPSGSTSKSKRKK*
>PopTri|Potri.015G079100.1	MMEQLHGLQSTGTDYSLQVPSENAGAPLVANYYHHMGFPSVAGEASFPFFGSEQLFCGSSVSDAASMVVELHHHHQQQQQQRGGGGGCVGDNSNSNNSQEEASCAIRAKIASHPLYPKLLEAYIDCQKVGAPPEMAYLLDEIREENDVSKRSDNTVASCLGADPELDEFMETYCDILMKYKADLSRPFDEATAFLNDIEAQFNTLCNGASRSQVHDEAVGSSDEDASGGDAEVQDCTRANEDRELKDKLLCKYSGYISTLKHEFSKKKKKGKLPKEAREVLLNWWTVHYKWPYPTEADKVALAESTGLEQKQINNWFINQRKRHWKPSENMQFAVVDSLYGPFFMND*
>OrySat|LOC_Os02g08544.1	MAFHYPDHGLAMDPSSAAASSPNPSFSPGGGGGGGVGGGEREKAAVAAHPLYERLLEAHVACLRVATPVDQLPRIDAQIAARPPPLAAASAAAAAGGPSGGEELDLFMTHYVLLLCSFKEQLQQHVRVHAMEAVMGCWELEQSLQSLTGASPGEGTGATMSDDEDNQVDSEANMFDGNDGSDGMGFGPLMLTEGERSLVERVRHELKNELKQGYKEKLVDIREEILRKRRAGKLPGDTASILKAWWQAHSKWPYPTEDDKARLVQETGLQLKQINNWFINQRKRNWHSNPASSGEKTKKKRNVTGDGGAEQSW*
>ZeaMay|GRMZM2G061101_P01	MHSSIPQTIKYPQIARWLARMEKQLPALTGGSKAATTTPFYLALDHRAAATSSSPPAEAPTLPPSAAAVSDPSRQSNSDRGSEIIKAKIMSHPLYPALLRAFIDCRKVGAPLEIVGRLSALADDVETNSDGRQEEQPADPELDQFMEIYCHMLVRYRQELTRPIQEADEFFKSMEAQIDSFSLDDNGYEEGGGSSDEDEQETVDLGGLPVPETGSPSGEGKELKNHLLNKYSGYLSSLWRELSRKKKKGKLPRDARQKLLHWWQLHYRWPYPSELEKAALAESTGLDAKQINNWFINQRKRHWKPAPPTMALGTPDYRMGQHGGGASSSSASAGLRVQGQYFTGGSSYPRGP*
>AraTha|AT4G08150.1	MEEYQHDNSTTPQRVSFLYSPISSSNKNDNTSDTNNNNNNNNSSNYGPGYNNTNNNNHHHQHMLFPHMSSLLPQTTENCFRSDHDQPNNNNNPSVKSEASSSRINHYSMLMRAIHNTQEANNNNNDNVSDVEAMKAKIIAHPHYSTLLQAYLDCQKIGAPPDVVDRITAARQDFEARQQRSTPSVSASSRDPELDQFMEAYCDMLVKYREELTRPIQEAMEFIRRIESQLSMLCQSPIHILNNPDGKSDNMGSSDEEQENNSGGETELPEIDPRAEDRELKNHLLKKYSGYLSSLKQELSKKKKKGKLPKEARQKLLTWWELHYKWPYPSESEKVALAESTGLDQKQINNWFINQRKRHWKPSEDMQFMVMDGLQHPHHAALYMDGHYMGDGPYRLGP
>SelMoe|415291	MAGGYAPTKFANMEEWLVEGLIEQAAEGLTTSPPPPPPPLAPTSSMAAPRTEHEDMDPRGSKVSLSDSEIMSAISGHPQYKELLRAHMNCYKVGASADLAAQMDELVRKREFESAVKTSIGVDPELDQFMVAYCNVLNAYEIELRRTFKEAIEFCKKQEHQLSVIAVSNIDVLSSGRETQVPCNAKVFNPDEQIFTETGAENEDASETYEDFMEEAESGGIGEVDTDLDPLAGDKELKKVLMKRYGGYIKGLTQEYLKKKKKGKLPKESRQQLLDWWSQHQDHPYPNENQKSNLAQSTGLDPKQINNWFINQRKRHWNPQAVRGESSQQRDAKSSS*
>AmbTri|evm_27.model.AmTr_v1.0_scaffold00026.137	MEHHQLNNENRRGAFIYTTSPFYGGENMECHGPDTTTTSMMALMTQNQDQQPQLHQRLMAPLPIHLLRGHESQSPQSFHLSSQSLKAEPAGFDRVVRSEHYRAHPGEVVAPRVYAMMLQSHEVENGSNNNTNNDDNAIKAKIVAHPQYSSLLEAYMDCQRVGAPPEVVDRLSAISRELETRQHSSASVGAAGSDPELDQFMEAYYDMLVKYREELTRPIQEATEFLRRIESELNSISNGSVRLFSSDDKGDGADSSEEDPDGSGGETELPEIDPRAEDRELKNHLLKKYSGYLGNLKLELSKKKKKGKLPKDARQTLLSWWDLHYKWPYPSETEKVALAESTGLDQKQINNWFINQRKRHWKPSEDMPYVVMDAHHSQNAALYIEGHLVGDGSYRLGP**
>PhyPat|Phpat.018G062500.1.p	MEQQTPSASVNVDSEARSCLTSSHNVYNTSSSAYTNFFNTTAYLPECHTMRPPAPPTYITTDTHRREGYSTSPFAPSCSNFSTLNCSAAHDMASEGSINRDMEKFQQELAYKCPRSSDLLLAITTSANTAVREHGSSAERRRRGNSGLFGNMSLLTEDEDDAPDAQDPEFEDNPQSEQDLELRAAIIDHPFYPEMVLAHVRVFKIGAPRRLRRKLDELAKKFQRFQDCDHTSKIGSDPELDHFMRSYVGVLTKFAEDLEEPFNKFIQFTDNTSKALEEICGHYVDTTPDEDNCGFDIGPLEYGAQEGDDLDTLGDENVMYPLDIDESVIVDPMASDEDIKKALRKKYGRHIGELKAEFNRVRKKGKLPTSARTILKDWFNRHSHWPYPSEMEKQYLQRI…
>OrySat|LOC_Os03g51710.1	MEELEGHRGEGRLPPPPPLLPFPKVSVQVYTVPSSSTAASAAAAGGARQAVAPATRDGGDGGGRAAGVLDDPVKARIVSHPRYHRLLAAFLDCHKVGCPAEAAEEIAAAARVREARQRAAAAASRMPPAPEDPELDQFMVCSIMKELKLVTEDYCKLLVECKEELSRPLQEAEEFLRTVESELNSINSGPPLTALISESKAGLDSSDDDEHEDGSGMEMMEAAEDEDLGIIDPRSDDKALKRHLLRKYSGYLGGLRKELSKKRKKGKLPKEARQKLLTWWELHYRWPNPSEMEKIALAESTGLEQKQINNCFINQRKRHWKPTEEMEFAVMEAYHHQSTDAAAAFYVDVDARLVGATAAAPASAVYTARPDHGVWRA*
>AmbTri|evm_27.model.AmTr_v1.0_scaffold00026.80	MAFHNLSQEMGGMPHFSEQHLGGENEALRTIISDQLHHSQSAIPPSEQKEHKLIMDPTKRQPQPRPQQQIGGGAGGGGGGAPPTWLSNAILRQQSAGGAHFDDANQAAAVGARKWCGCAPGSRCVQCSFLHLQTGDDVTAVSSDSMIGGGAGMSGDVNNGSGELVESEKSEAQQQQHQQQQGGGGGGGGGGGGGGGGVGGWESARYKAEILSHPLYEQLLSAHVACLRIATPVDQLPRIDAQLAQSQHVVAKYSVLGASGQIVPGNGDDKDLDQFMTHYVLLLCSFKEQLQQHVRVHAMEAVMACWDLEQSLQSLTGVSPGEGTGATMSDDDDDQADSDTNLYEGSLDGQDTMGFGPLIPTESERSLMERVRQELKHELKQGYKEKIVDIREEILRKRR…
>ZeaMay|GRMZM2G370332_P02	MSFHYPDHGLSMDAAAAAAAAAAASSPNPSGFSPGVGGEREKAAIAAHPLYERLLEAHVACLRVATPVDQLPRIDAQIAARPPPLAAAAGAAAAGGPSGGEELDLFMTHYVLLLCSFKEQLQQHVRVHAMEAVMGCWELEQSLQSLTGASPGEGTGATMSDDEDNQVDSEANMFDGNDGSDGMGFGPLMLTEGERSLVERVRQELKNELKQGYKEKLVDIREEIMRKRRAGKLPGDTASVLKAWWQAHSKWPYPTEDDKARLVQETGLQLKQINNWFINQRKRNWHSNPTSSGEKTKKKRYHNESCFAVA*
>ZeaMay|GRMZM2G433591_P01	MEKTNPKSQTCVAFQPNQPTPSSSVNPSIRLSLPPPPTKTPNRRGHRRLRPRRAAPRREDVVPLPRPRAVHGRRGGGGRRRRVVAEPSGFSPGIGGEREKAAIAAHPLYERLLEAHVACLRVATPVDQLPRIDAQIAARPPPLAAAAGAAAAGAAAAGGPSGGEELDLFMTHYVLLLCSFKEQLQQHVRVHAMEAVMGCWELEQSLQSLTGASPGEGTGGTMSDDEDNQVDSEANMFDGNDGSDGMGFGPLILTEGERSLVERVRKELKNELKQGYKEKLVDIREEIMRKRRAGKLPGDTASVLKAWWQAHSKWPYPTEDDKARLVQETGLQLKQINNWFINQRKRNWHSNPTSSAEKTKKKR*
>OrySat|LOC_Os03g03164.2	MQGGDHGGMEMGVGSFTGGGGGGECSSSSATAAAAAAAAAAAAAAEAEERQLLKGEIAVHPLCEQLVAAHVGCLRVATPIDHLPLIDAQLAQSSGLLHSYAAHHRPFLSPHDKQELDSFLAQYMMLLCSFREQLQQHVRVHAVEAVMACREIEQSLQDLTGATLEEGTGATMSEDEDETAPMLEGPMDMGSDGHDLMGFGPLMPTDSERSLMERVRQELKIELKQGFKSRIEDVREEILRKRRAGKLPGDTTTILKQWWQQHSKWPYPTEDDKAKLVEETGLQLKQINNWFINQRKRNWHNNSQTSTLKSKRKR*
>PicAbi|MA_10428446g0010	MMALMTEHQPESESIMTSIPIPSSYSSYSHGHGHGHGHGHGHGQSECLLSAAAMFQSSRPCQGANKFEPANAHIGGGGAGHFVMEQFIPEQAVISDSSISSVKTEVCSGSGGTGVPGQFELIRRKEEGRCARAYAEPSFVVTPLVTSLPPQQQEARMVTSLAVDMDSSCSCKPIEADAMKAKIIAHVHYPRLVAAYIDCQKVGAPPDVVSELDELSQKCHAQQCVATISIGADPELDQFMEAYCEMFIKYQEELTKPFKEAMAFLKKIENQLGALTKGTIRTSSLDQGDERGDGAASSEEEDGSGGEVEFHEVDPHAEDRELKDQLLRKYSGYLSSLKQEFLKKKKKGKLPKEARQKLLDWWTRNYKWPYPSESQKIALAESTGLDQKQINNWFINQRK…
>ZeaMay|GRMZM2G135447_P01	MDSFGDLGGGGSSSSRAASAPFLQLPLPASTSSAQQQVLFPLPDGPQQQHHHHSSRIPLRQLLLLADPSSAAQHSASHRTKDMATVQGEMSSPAVDGDADAIKARIMSHPQYSALLAAYLDCQKVGAPPDVSDRLSAMAAANLDAQPGPISRRRGPTTTRADDPELDQFMEAYCNMLVKFHEEMARPIQEATEFFNSMERQLGSTISDSNCEVAGSSEDEQDASWPEEIDPCAEDKELKHQLLRKYGGYLGGLRQEFSKRKKKGKLPKEARQKLLHWWELHYKWPYPSETEKMALAETTGLDPKQINNWFINQRKRHWKPASEDMPFAVMEGGFHVAQGTAALYMDRPAVPPFMADGGMYRLGS*
>PopTri|Potri.018G022700.1	MAYHHNLSSQDLPLHHFTDQQATENHTAPPNWLNTALLRSQQPPQQQTHHHFTDNNNTNNFLNLHTAATTATAATSDSNSHNPVQWLSRSSSSLLNRNHSDVIDDVAAGGDHAIITSISQESSELKNMNKGEGEAMDSGGGESVVNWQNARYKADILTHPLYDQLLSAHVACLRIATPVDQLPRIDAQLAQSQQVVTKYSALGSHQGLVPDDKELDQFMTHYFLLLCSFKEQLQQHVRVHAMEAVMACWEIEQSLQSLTGVSPGEGTGATMSDDDEDQVDSDANLFVGSLEGADTLGFGPLVPTESERSLMERVRQELKHELKQGYKEKIVDIREEILRKRRAGKLPGDTTSVLKAWWQSHSKWPYPTEEDKARLVQETGLQLKQINNWFINQRKRNWH…
>ZeaMay|GRMZM5G832409_P01	MEDLYSIHPGISRHGAAATSEASGVAGGPGSPPPPPPPAADLTELVKAQIAGHPRYPSLLSAYIDCRKVGAPSEVATLLEEIGRERCAAASAGGEVVGMDPELDEFMETYCRLLERYKEELSRPFDEAASFLSSVRTQLSSLCGGAASLSDEMVESSEDEPCSGDTDATTDPGQEHSSRLADRELKEMLLKKYSGCLSRLRSEFLKKRKKGKLPKDARSALMDWWNTHYRWPYPTEEDKVRLAAMTGLDPKQINNWFINQRKRHWKPSEDMRFALMEGGVSGSSSGTTLYFDTGTIGP*
>OrySat|LOC_Os03g56110.1	MESFASLAGGGSSSTTARLPELISPENPDHISPPPLLYQLLAGPESSARQHGHDGHHHGGGGGEAAAAAVQGQVSPAGAEAAVKAEIMSHPQYSALLAAYLGCKKVGAPPDVLTKLTAVPAAQQLDEADGHPRRRHEPQRDDDPDQLDQFMDAYCSMLTRYREELERPILEAAEFFSRVETQLDSLAESNCEGTGSSEEEQDPSDKQLKHQLLRKYGGSLGDLRQVFSKRTKKGKLPKEARQKLLHWWELHYKWPYPSEMEKMTLAQTTGLDQKQINNWFINQRKRHWKPTPVAGTAFPTMEAAGGGFRHSGHGGGLAAAAALPLYMGRPFVVDGMYRLGS*
>VitVin|GSVIVT01031241001	MDDLYRLQHEGISISGANAAAATIDFRRSVENSNVYRFESVETEAGMSDLIKSQIVNHPRYPNLVSAYIECRKVGAPPEMASLLEEIGRESQPMNSRSGEIGADPELDEFMESYCEVLHRYKEELSKPFDEATSFLSDIESQLSNLCKGALTAGTSGSYYSDEAAGTSEEELSCGEAEVSESQESLGARPGDQELKEMLMRKYSGYLSSLRKEFLKKRKKGKLPKDARTMLLEWWNTHYRWPYPTEDEKLKLSEVTGLDQKQINNWFINQRKRHWKPSEDMRFALIDGVSGNMGGGPVFLDTRGGTGSNI*
>PopTri|Potri.004G004700.1	MEGGGAGCSSTPSLMMAFGDSSNGLCPMMMMPLMSSSSSAHQHHHQQQHVNAGDSSISNTLFLPLPPTNYQSQNRINNSASGSSMILDDHNHNNNTVTATGCYFMENNDGGSSSTSVKAKIMAHPHYHRLLAAYANCQKVGAPPEVVARLEEACASAASMGPANTDGIGEDPALDQFMEAYCEMLTKYEQELSKPLKEAMVFLQRVECQFRALTLSSPNSAWGEGNDRNASSEEELDVNNKFIDPQAEDQELKGQLLRKYSGYLGSLKKEFMKKRKKGKLPKEARQQLLDWWSRHHKWPYPSESQKLALAESTGLDQKQINNWFINQRKRHWKPSEDMQFVVMDAGHPHYYMDNVLGNPFPMDISHTLL*
>VitVin|GSVIVT01030488001	MAHPHYPRLLAAYVNCQKVGAPPEVVARLEEACASEEAMGRSATSCVGEDPALDQFMEAYCEMLTKYEQELTKPFKEAMLFLSRIECQFKALTVAPSDSVCGSYAGRVGSSEEEVDGNDTCIDPQAEDRELKGQLLRKYSGYLGSLKQEFLKKKKKGKLPKEARQQLLDWWSRHYKWPYPSESQKLALAESTGLDQKQINNWFINQRKRHWKPSEDMQFVVMDATHPHYYMDSVMGNPFPMDCTPTLL*
>HupSel|comp68252_c0_seq2_3|KNOX2-1	QQQQQQQHQRQQQEGEGGQSRGWCNCEDEMRCCLHCSSEVCGDARGSAESQFMERVVDHLPPKPDKRNHLIDETALDADDCVKLQTAGLKAEIVSHPLYEQLLDAHVACLRIATPVDQLPKIDGQLVFCNHITAKYSSLGNQHLLFGNNKDELDQFMSQYLSLLRSFKEKLQHHVCLHAKEAVWACRELECSLLNLTGASPGEGSGEGMSDEEDEQAEYELWQDDLGFGPLVPSETERTLMERVRQELKDELKQGYRARIADVREEILRKRRAGKLPGDTTSVLKAWWHAHSKWPYPTEDEKTRLVQETGLELKQINNWFINQRKRNWHQHSASATSLKAKSKR*
>PopTri|Potri.013G008600.1	MEGFYRFNPTISCSPNDIARLENLPVVNFTDATTSNNEFHSQVGNLLQAGHGYTPVTESDMHDVIKTQIANHPRYPDLVSAYVECRKVGAPPEMVSLLEDIGRCSYQINTCYEIGADPELDEFMESYCEVLHRYKEELSKPFDEATTFLSSIESQLSSLCKGTLTKIFDYGSADEPAWTSEEELSCGEVEASEIPGSLGFHSSDQNLKGVLLSKYSGHLSSLRKEFLKQRKKGKLPKDAKTLLLDWWNHHYRWPYPTEEEKAKLSEITGLDQKQINNWFINQRKRHWKPSKDMRFALMESVGGDTAGPTCYGIVGDDIGT*
>SelMoe|90744	MVAEEQGGGGGGMDSKLWQSARLKADLVTHPLYEQLLSAHISCLRTATPVDQLPKIDAQLAHSSQVAAKYSILATNEQGLSKDKDEVNEFMAHYVTLLRSFKDQLQQHVRVHAMEAVVACWELEQSLFTLTGKHNFTSRSKREGTGATMSEDEDDQQADSDSGYYDAGMDGHDFTGFGPLIPTETERTLMERVRHELKIELKQGYKAKINDVREEILRKRRAGKLPGDTTSVLKTWWHAHSKWPYPSEDDKARLVQETGLELKQINNWFINQRKRNWHSNPSSSTSLKNKRKR*
>PicAbi|MA_10428500g0010	MVPRPGVDVVDVHLTRVILLAGRQSRGTWRAHPSRWTAVTRDLAGPPDMNEGSGLKVGATATWLNSLSHHHHHHHPNSHVEGDQPGMMGFSAQQQHSHGSTIIDHSASAAAAAAGGGGGGGGGQGRGMLDLHSDTANSSELLGSSRSDGDHPHHHHDQQQQQQENHMVWQNSRLKADVLQHPLYDQLLAAHVACLRIATPVDQLPKIDAQLAQQHHVVAKYSVLGRNQLLTGEEKEELDRFLAQYVLLLSSFKEQLQQHVRVHAMEAVMACWELEQSLHTLTGVSPGEGTGATMSDDEDDQADSDTNLFDLGLDGQDGVGSFGPLIPTENERSLMERVRQELKHELKQGYRSRIEDIREEILRKRRAGKLPGDTTSVLKNWWQAHSKWPYPTEDEKTRL…
>HupSel|comp65053_c0_seq5_2|KNOX1-1	PSLTHSLLRHSKAADTYVTISVMKNKQLSDRIFHTNLQSTYDICSDEEPHGSSFALGSSYYNTQPMASSRLHEREDEAEVGSPSTFASLEEYLSMPPYQEELVNTMSPDQSTHLRHHLSSGHVSHHGKELMSRDCFSKASVVAISSESKEVYRLNPPQLTSHQLAPGDLNLEEENEMKAAIVSHPHYSLLVAAHMNCHKVGAPPEVVSQINDLIRKFQETQPSATSSIGVDPELDQFMYTYCNMLLNYEQEITKTFEEAMVCCKKLETQLNIISTGSIASGESEERNDGGVTSDEDDSGCEDLEIDPLAEEKEIKEHLMRKYSGYIGSLKQEFSRKKKKGKLPRESRQQLLNWWSSHIKWPYPSEVEKASLAESTGLDQKQINNWFINQRKRHWKPSED…
>OrySat|LOC_Os05g03884.1	MEDLYSIHPGISRGGGGGGGGAASEASGVAGGGSSPPHPPPPATTAAAADLTELMKAQIAGHPSYPSLLSAYIECRKVGAPPEVTTLLEEIGREGRGGGGGATAGGEIGLDPELDEFMETYCRVLERYKEELTRPFDEAASFLTGIHTQLASLCGGAPPPTDNSDEMVGSSEDEPCSGDADAADFGQEHSSRLADHELKEMLLKKYSGCLSRLRSEFLKKRKKGKLPKDARSALMDWWNTHYRWPYPTEEDKVRLAAMTGLDPKQINNWFINQRKRHWKPSEDMRFALMEGVTGGSSSGTTLYFDTGTIGP*
>PopTri|Potri.002G113300.1	MEDYNQMSENTTPRGNFLYASQLLAPNSSPYGRTSSGSTVSNQQTQMPLNPFHLQSNDQCFQSDTHPIVKTEASTSHAQKFHYPLLRGYQTINQQQQGSESSSEVEAIKAKIIAHPQYSNLMEAYMDCQKVGAPPEVVARLAAARQEFESRQRSFITSRDNSKDPELDQFMEAYYDMLVKYREELTRPIQEAMDFMRRIETQLNMICHGPLRIFNSDDKSEGVGSSEDDQDNSGGETELPEIDPRAEDRELKNHLLRKYSGYLGSLKQELSKKKKKGKLPKEARQKLLSWWELHYKWPYPSETEKVALAETTGLDQKQINNWFINQRKRHWKPSEDMQFMVMDGLHPQNAALYMDGHYMGDGHYRLGP*
>HupSel|comp66132_c1_seq1_3 |KNOX2-2	RKLAKHSLLLMDFENSSQNVSLQQFSDQLQNTSSRSSLGPEQDQFRRILQKRSDSTKIQEMSQQELRPYSRRSSDACELQNQNLNSVEAGDHHAKELRSVCDENRFCEPPSNIIKLGGPTNWLSNASLRSEQSQSCGIEADGRKWCGCLEGSQCMHCTSTSHHTTVTPSPPSLPNSTTYATWLSMPVSEGLHHVQQHQGSTAELVDGISNEILQNKKQFQGSVDRSSHSPRQGKALQVDLHQHASNSHDLVDDEAVENEDHSSIWENVRLKAEIVSHPLYDQLLTAHVACLRTATPVDQLSKIDAQLVHASHVAAKYSVLVHDHDFLTREDKDELNQFMTQYVMLLHSFKEQLQQHVRVHAMEAVVACWEMEQSLHNLTGVTPGEGTGATMSDDEDEHL…
>PopTri|Potri.012G087100.1	MMEELYGLQSTSSDYSLQVPSENMVSPVANYYHPVGFTSPAGEPSFPVFGSEQMFCGSSVSDAASMGAELHQKQQQQSGGVGVGDHSNRNNSEEVSCAIRAKIASHPLYPKLLEAYIDCQKVGAPPEMAYLLDEIRLVNDVSKGSNDTVASCLGADPELDEFMETYCDVLMKYKADLSRPFDEATTFLNDIEAQFNTLCNGPSRSQVYDEAAGSSDEDASGGEAGMQDSTRINEDRELKDKLLRKYSGYISTLKHAFSKQKKKGKLPKEARQILLNWWNIHNKWPYPTEADKVALAESTGLDQKQINNWFINQRKRHWKPSENMQFAVVDSLYGPFFMND*
>AmbTri|evm_27.model.AmTr_v1.0_scaffold00045.202	MEDAFRLNPLAECVKEAVMSSSMAAIMDNQRPTSFSSAVDYGSQEEEEFPRIEERAEGEEEVYDTIKAKIANHPRYPRLLQAYIDCTKVGAPPEDAALLEETVWLSGGGGSAQTCMDPELDEFMESYCKVLLKYKLELSRPLEEASSFLTNTEAQLINLCKASAVLEEGVGSSGEEASWGGKDTKGGNNNDQKEIKEQLLRRYSGYLSGLKREFLKKRSKGKLPMEARHRLLDWWNAHYKWPYPSESDKVELAESTGNRFLTNRGNNHSLISNIGSKIYHWSTHHLSLHSILFPLLLLLPDFFEDNKLQEYVIQSHMVHHHLILPILHHIICFVFRLSGKNCRHLISIVDNVQWRILHHHHNPIGTTQKIRTQYPSLAQDLPQWTP*
>PopTri|Potri.005G014200.1	MEEFYRFNPTFFSSPDDTVRLENLPVANFTDATASTATEFHSHASSFLQAGHGHREVTGSDMYDAIKTQIANHPRYPDLVSAHLECQKVGAPPEMVSLLEAIGRGNYKINSFYEIGADPELDEFMESYCEVLRRYKEELSKPFDEAATFLSSIESQLSSLCKGTLTKMFDYGSADEPAGTSEEELSCAEVEASESQETTGVSSQEQNLKGMLMRKYSAHLSNLRKEFLKNRKKGKLPKDARTTLLDWWNHHYRWPYPTEEEKAKLSEITGLDQKQINNWFINQRKRHWKPSEDMRFPRMDGVSGDPGTPPNMLWYCW*
>PopTri|Potri.006G259400.1	MAFHHNLPSQDLPLHHFTDQQATENTTAPPNWLNTALLRSQQPPQQRTHHHFTDNNNTNNFLNLHSATPSTTATTSDSASHNPTQWLSRSSSSLLNRNHSTVIDDVSAAAAGGDHPIIASMSQESSELKSMNKSEGETMVESGGGGGEAVVNWQNAKCKADILAHPLYDQLLSAHVACLRIATPVDQLPRIDAQLAQSQQVVAKYSALGSHQGLVPDDKELDQFMTHYFLLLCSFKEQLQQHVRVHAMEAVMACWEIEQSLQSLTGVSPGEGTGATMSDDDEDQVDSEANMFDGSLEGVDTMGFGPLVPTESERSLMERVRQELKHELKQGYKEKIVDIREEILRKRRAGKLPGDTTSVLKAWWQSHSKWPYPTEEDKARLVQETGLQLKQINNWFINQ…
>PhyPat|Phpat.005G097000.1.p	MATELNLSPAGHGRDNHALFTDPRHSVAQGGSRYAEDYERTEHQTDWEGATQKMEWEQARDKFLIVAHPLYPDLLNAHASCLRVGTPVDQLPHIEAQLTQARHVTSKYSVLHPDHLEITEDEKTELDQFMAQYIMLLCSFKDHLQQHVYYDVTEAMMSCWELEQALHNLTGVSAGESTGATMSEEDEDYDSDYGAYDAHMDPQDSGGFGPLVPTESERTLMERVRQELKYELKQGYRARIVDVREEILRKRRAGKLPEGTTTVLKAWWQAHSKWPYPTEDEKERLIQETGLELKQVNNWFINQRKRNWHSNPLSSSSELKSKRKK*
>OrySat|LOC_Os03g51690.2	MEEISHHFGVVGASGVHGGHQHQHHHHPWGSSLSAIVAPPPPPQLQQQQTQAGGMAHTPLTLNTAAAAVGNPVLQLANGSLLDACGKAKEASASASYAADVEAIKAKIISHPHYSSLLAAYLDCQKVGAPPEVAARLTAVAQDLELRQRTALGVLGAATEPELDQFMEAYHEMLVKYREELTRPLQEAMEFLRRVETQLNTLSISGRSLRNILSSGSSEEDQEGSGGETELPEIDAHGVDQELKHHLLKKYSGYLSSLKQELSKKKKKGKLPKDARQQLLNWWELHYKWPYPSESQKVALAESTGLDLKQINNWFINQRKRHWKPSDEMQFVMMDGYHPTNAAAFYMDGHFINDGGLYRLG*
>ZeaMay|GRMZM2G055243_P01	MAFNYHDHALAMDPAAAAAVGAAANPSFVSGGGMAGGPGWEREKAAIAAHPLYERLLEAHVACLRVATPVDQLPRIDAQIAARPPPMEAAAAAAAAGGAHSGGEELDLFMTHYVLLLCSFKEQLQQHVRVHAMEAVMACWELEQTLQSLTGASPGEGTGATMSDDEDNQVDSESNMFDGNEGSDGMGFGPLMLTEGERSLVERVRQELKHELKQGYRDKLVDIREEILRKRRAGKLPGDTASTLKAWWQAHSKWPYPTEEDKARLVQETGLQLKQINNWFINQRKRNWHNNSASSSSDKSKRKRNTAGDGNAEPAW*
>AraTha|AT4G32040.1	MSFNSSHLLPPQEDLPLRHFTDQSQQPPPQRHFSETPSLVTASFLNLPTTLTTADSDLAPPHRNGDNSVADTNPRWLSFHSEMQNTGEVRSEVIDGVNADGETILGVVGGEDWRSASYKAAILRHPMYEQLLAAHVACLRVATPVDQIPRIDAQLSQLHTVAAKYSTLGVVVDNKELDHFMSHYVVLLCSFKEQLQHHVCVHAMEAITACWEIEQSLQSLTGVSPSESNGKTMSDDEDDNQVESEVNMFDGSLDGSDCLMGFGPLVPTERERSLMERVKKELKHELKQGFKEKIVDIREEIMRKRRAGKLPGDTTSVLKEWWRTHSKWPYPTEEDKAKLVQETGLQLKQINNWFINQRKRNWNSNSSTSSTLTKNKRKRTGKS
>PopTri|Potri.008G188700.1	MEGTYGLHSTVADYSDKALMSPENLILTTEYQSLLSSETFRQRIPIQGSQELLSEAASITTEIQREGDMSSLVKAKIASHPSYPRLLEAYIDCQKVGAPPQIARFLDEIRRENDLFKHDAVSTYWGADPELDEFMETYCDLLVKYKSDLERPFDEATTFLNKIEMQFRNICTAASIRSVSGQSLSLSLFPGKDPLGSELLNNISRNHNGSDGAPSSDDELSGGEMDMHEAQPSGEDRELKDKLLRRFGGHIGTLKREFSKKKKKGKLPKEARQTLLGWWNVHYKWPYPTEADKLALAESTGLDQKQINNWFINQRKRHWKPSENLQFAVMNNLSGQFLAED*
>VitVin|GSVIVT01013790001	MEEVYGLNSTSDYSDKVLMSPENLILPADYQSFFSSAAAFRDYRIPVFGSNELISVASAISETASITPEIQREEDVSSVIKAKIASHPCYPRLLEAYIDCQKVGAPPEIACLLDEIRRENDVCKRDAVSTCLGADPELDEFMETYCDMLEKYKSDLARPFDEATTFLNKIEMQLGNLCNDASIRSLPDEAVVSSDEDFSGGEEVQEAQPRGEDQELKERLLRRFGGRISSLKLEFSKKKKKGKLPKEARQTLLEWWNLHYKWPYPTEADKIALAETTGLDQKQINNWFINQRKRHWKPSENMQFAVMDNHSGQFFTDD*
>OrySat|LOC_Os07g03770.1	MDQSFGNLGGGGGAGGSGKAAASSFLQLPLSTAAAATAYYGTPLALHQAAAAAGPSQYHGHGHPHHGGGHHHSKHGGAGGGEISAAEAESIKAKIMAHPQYSALLAAYLDCQKVGAPPEVLERLTATAAKLDARPPGRHDARDPELDQFMEAYCNMLAKYREELTRPIDEAMEFLKRVESQLDTIAGGAHGGGAGSARLLLADGKSECVGSSEDDMDPSGRENEPPEIDPRAEDKELKFQLLKKYSGYLSSLRQEFSKKKKKGKLPKEARQKLLHWWELHYKWPYPSETEKIALAESTGLDQKQINNWFINQRKRHWKPSEDMPFVMMEGFHPQNAAALYMDGPFMADGMYRLGS*
>PopTri|Potri.011G011100.1	MEGGGGDGGSSTTSCMMAFGDNSNGLCPMMMMTPLMSSSSSAHHQHPHHHHRANEGDSSISNTLFLPLPPTNNQGHNRIHSNASGSSSMIIDDHNRNHNNNTVTATGCYFMDNNDGSSSSVKAKIMAHPHYHRLLAAYANCQKVGAPPEVVARLEEACASAASIAPANTGCIGEDPALDQFMEAYCEMLTKYEQELSKPLKEAMLFLQRVECQFKALTLSSPISGCGDGNDRNVSSEEEVDVNNNFIDPQAEDQELKGQLLRRYSGYLGSLKQEFMKKRKKGKLPKEARQQLLDWWSRHYKWPYPSESQKLALAESTGLDQKQINNWFINQRKRHWKPSEDMQFVVMDAGHPHYYMDNVLGNPFPMDISPTLL*
>PinTae|PITA_000042242-RA	MKLLGCSRRLDGGGTRYSERRAPAGQLGIAEEGKEEIPIPRQRYGSLGYTEAQSSSSSAKAALAGAVRVKITLSLERLTLGSAEPSRDSTGRSSSSSTTRNGAWKRAGNGAAARPALATLQNPASAGSSSAAANALSGRWLMPGPLLNDKIEGREGVELLGGEIPGESIMALSAQFKTAGSAAPERGLLNLHSADAVNSNGEPVDSGGAGGDRDGGEEAEDHAALWQSARIKADIVSHPLYDQLLSAHLECLRIATPKDQHSMIDAQLEQSQHVVTKYSVLGNDNFLVGDKKELDQFMTQYVLLLCSFKEQLQYHVHVHVMEAVRACIDLQHSLLTLTGVSPGEGTGATMSDDEDDNADSDTDLYDGGLDGGQDIVGLGPLIPTESERSLMERVRQELK…
>AmbTri|evm_27.model.AmTr_v1.0_scaffold00001.399	MVGEGVAEEEERERVKAEIAGHPLYEQLLAAHVGCLRVATPIDQLPLIDAQLARSHNLLRAYSAIRLRNPNPILHPHDRQHLDQFLAQYVLVLSSFKEQLQQHVRIHAVEAVTACREIEQSLHALTGATLGEGTGATMSDDEDDLQMDFAMDAGAEAQDMMRFGPLLPTESERSLMERVRQELKIELKQGFRSRIEDVREEILRKRRAGKLPGDTTSVLKQWWQQHSKWPYPTEDDKTRLVDETGLQLKQINNWFINQRKRNWHSNSQSVTCLKSKRKR*
>VitVin|GSVIVT01012897001	MAFHNQLSHDMALQHFTDSHLTENTAVLRGILPEQLGQSSSDGAGKPPSHQQLGGGGGGGGPTWLNNAILRQQSQYADGSFLHLQTNSDSTSSPATATTTTNQWLSRSMSNKRNGGNNQNRGDNNGEDMLDCDSGGNWENARYKADILAHPLYEQLLSAHVSCLRIATPVDQLPRIDAQLAQSQGVVTKYSVLANQPLDDKELDQFMTHYVLLLCSFKEQLQQHVRVHAMEAVMACWELEQSLQSLTGVSPGEGTGATMSDDEDDQADSEINLFDGSLDGPDSMGFGPLVPTETERSLMERVRQELKHELKQGYKEKIVDIREEILRKRRAGKLPGDTTSLLKAWWQSHSKWPYPTEEDKARLVQETGLHLKQINNWFINQRKRNWHSNPSSSAVLKTK…
>AmbTri|evm_27.model.AmTr_v1.0_scaffold00123.12	MEGQSSCLFGYSAMMGFGENNNSSSNNSNNNDNRSNGGGGGGGGCFGGNAMMIVTPSSPPVLQRPAHGEEANNKDKKSNDSCYMVEDETSMKAKIMAHPHFARLLNAYVNCQKVGAPPEVVAQLEEVCVAAAAASKSSSTTAAAAAAAAAAAARGGEEEEPALDQFMEAYSEMLTKYAQELTKPLEEAMLFLSRIDSQFKALTLTSPSPSSAFARTLERNGSSEDEVDAIDNGIDPLAEDRELKGQLLRKYSGYFGSLKQEFLKKRKKGKLPKEARQQLLDWWGRHYKWPYPSESQKLALAESTGLDQKQINNWFINQRKRHWKPSEEMQFVVMDASQPTHYYMDDNLLHFPMDCTSTLL*
>ZeaMay|GRMZM2G087741_P01	MEDLYSIHPGISRVVGGAASEASVAGAGAGGPSPSDLTELMKAQIASHPRYPSLLSAYIECRKVGAHPHVTSLLEEVSRERRPDAGAGEIGVDPELDEFMDAYCRVLVRYKEELTRPFDEAASFLSSIQAQLSDLCSGGSSPAATATHSDDMMGSSEDEQCSGDTDVPDMGQEHSSHLGDHELKEMLLKKYSGCLSRLRSEFLKKRKKGKLPKDARTVLLEWWNTHYRWPYPTEEDKVRLAAMTGLDPKQINNWFINQRKRHWKPSEDMRFALMEGVAGGSSGTTLYFDTGTIGP*
>AmbTri|evm_27.model.AmTr_v1.0_scaffold00085.101	MDEIYGLHSAIGYSSAEGSAGMGSSLPPESLIAAAGDYLSSYVFNRDKIGGSGGAAAGGGMEQLAELPPATGENSISEVYGQEVATSIKAKIATHPRYPTLLEAYIECQKVGAPPEIANLLEEIRRENHNYACNSNSVTGCLGADPELDQFMESYCEVLVKYKSDLAKPFDEATTFLNKIEMQLNNLCSGSSRTCASDELAGSSDDELSGGEIDLQETRSRGEDRELKDKLLRKYSGYLSSLKQEFSKKKKKGKLPKEARQTLLDWWNIHYKWPYPTESDKIALAESTGLDQKQINNWFINQRKRHWKPSENMQFAVMDTLSAPFYVDH*
>SelMoe|135843	MNAGLKADIVTHPLYEQLLEAHVACLRIATPVDQLSRIDGQISQCHHAIAKYSILANHQLLCGSSKEELDHFMAHYVMLLKSFKDQLQHHVRVHAKEAVMACWELEQSLISLTAGAAPGEGTGATMSDDEDEQQQPQQEQQQQQQSDSDYWQDNLGFGPLIPTETERTLMERVRQELKHELKQGYRARIVDVREEILRKRRAGKLPGDTTSVLKAWWHAHSKWPYPTEDEKARLVQETGLELKQINNWFINQRKRNWHHHPSSSTNSSTKAKCKR*
>OrySat|LOC_Os08g19650.1	MGGGGEADAARCKAEILAHPLYEQLLSAHVACLRIATPVDQLPRIDAQLAQSQGVVAKYSALAAAAAGDDGRELDQFMTHYVLLLCSFKEQLQQHVRVHAMEAVMACWELEQNLQSLTGASPGEGTGATMSDGEDDQADSEANMYDPSLDGADNMGFGLPTESERSLMERVRQELKHELKQGYKEKLIDIREEILRKRRAGKLPGDTTSTLKAWWQSHAKWPYPTEEDKARLVQETGLQLKQINNWFINQRKRNWHSNPSSSTSVKTKRKSNAGDNNS*
>VitVin|GSVIVT01004811001	MAHPHYHRLLAAYANCQKVGAPPEVVARLEEACASEAAMVRTGTSCIGEDPALDQFMEAYCEMLTKYEQELSKPFKEAMLFLSRVECQFKALTVSSSDSAGGEGLDRNGSSEEEVDVNNNFIDPQAEDRELKGQLLRKYSGYLSSLKQEFMKKRKKGKLPKEARQQLLDWWSRHYKWPYPSESQKLALAESTGLDQKQINNWFINQRKRHWKPSEDMQFVVMDATHPGHYYMDNVLGNPFPMDLSPTLL*
>ZeaMay|GRMZM2G028041_P01	MDQSFGNLGAGAGSSSGGSNSKAAAAAVSSSSFLQLPLSTASPAYYGAPLALLHHAAAAPSSSQQHQQQQHHHHYARHGAEMSAAEAEAIKAKIVAHPQYSALLAAYLDCQKVGAPPDVLERLTAMAAKLDARPPGRHEPRDPELDQFMEAYCNMLVKYREELTRPIDEAMEFLKRVEAQLDCISGGGGSSSARLSLADGKSEGVGSSEDDMDPNGRENDPPEIDPRAEDKELKYQLLKKYSGYLSSLRQEFSKKKKKGKLPKEARQKLLHWWELHYKWPYPSETEKIALAESTGLDQKQINNWFINQRKRHWKPSEDMPFVMMEGFHPQNAAALYMDGPFMADGMYRLGS*
>AraTha|AT1G62360.1	MESGSNSTSCPMAFAGDNSDGPMCPMMMMMPPIMTSHQHHGHDHQHQQQEHDGYAYQSHHQQSSSLFLQSLAPPQGTKNKVASSSSPSSCAPAYSLMEIHHNEIVAGGINPCSSSSSSASVKAKIMAHPHYHRLLAAYVNCQKVGAPPEVVARLEEACSSAAAAAASMGPTGCLGEDPGLDQFMEAYCEMLVKYEQELSKPFKEAMVFLQRVECQFKSLSLSSPSSFSGYGETAIDRNNNGSSEEEVDMNNEFVDPQAEDRELKGQLLRKYSGYLGSLKQEFMKKRKKGKLPKEARQQLLDWWSRHYKWPYPSEQQKLALAESTGLDQKQINNWFINQRKRHWKPSEDMQFVVMDATHPHHYFMDNVLGNPFPMDHISSTML
>AraTha|AT1G70510.1	MDRMCGFRSTEDYSEKATLMMPSDYQSLICSTTGDNQRLFGSDELATALSSELLPRIRKAEDNFSLSVIKSKIASHPLYPRLLQTYIDCQKVGAPMEIACILEEIQRENHVYKRDVAPLSCFGADPELDEFMETYCDILVKYKTDLARPFDEATTFINKIEMQLQNLCTGPASATALSDDGAVSSDEELREDDDIAADDSQQRSNDRDLKDQLLRKFGSHISSLKLEFSKKKKKGKLPREARQALLDWWNVHNKWPYPTEGDKISLAEETGLDQKQINNWFINQRKRHWKPSENMPFDMMDDSNETFFTE
>ZeaMay|GRMZM2G159431_P01	MQRGGDQAGASLGMEMGVGYAGGGGGGECSSSSAAAAAAAAAEGEERQLLKGEIAVHPLCEQLVAAHVGCLRVATPIDHLPLIDAQLAQSSGLLHSYAAHHRPFLSPHDKHDLDSFLAQYLMLLCSFREQLQQHVRVHAVEAVMACREIEQSLQDLTGATLEEGTGATMSEDEDEAPMLEVGLDMGSDGHDMMGFGPLMPTDSERSLMERVRQELKMELKQGFKSRIEDVREEILRKRRAGKLPGDTTSILKQWWQEHSKWPYPTEDDKAKLVEETGLQLKQINNWFINQRKRNWHNNSQTSTLKSKRKR*
>PicAbi|MA_9556g0010	MEHLNTAAAQASSSLYGVGMAEYGDAGVSSLYGVGMAEYGDAGVSSMMALITQHEPHDSESIMSTRMPSSFSSFHGHADCLLSAAMFQASQGDHKLKRQPGMDQLVSEQAGMSDSSMPSVKTEVCSGLRNQFEFHREQTGNCYTDQSSNTPVNPLVTSLASQARGEAQMIPSLDANSPHFNVDNEEYAIKSKILAHPQYPSLLGAYIDCQKIGAPPEAVARLDALTREYQNQQRRTVSIGMDPELDQFMEAYCEILTKYHEELAKPFKEAMTFLMKIEAQFNSLGKGTIRISPPAENDEKTEGGGSSEEVEDGSGGETDFQEVDHHAVEDRELKDHLLRRYSGYLSSLKQEFMKKKKKGKLPKDARQKLLDWWSLHDKWPYPSETEKIALAECTGLDQK…
>ZeaMay|GRMZM2G452178_P01	MDQNFGNLGTGAGSSGGCGGSNSNSKAVAAVSSSSFLQLPLSTAAAASPAYYGAPLALLHHGTTAGPSSSQQQQHQSPYAKHGAEMSAAEADAIKAKIVAHPQYSALLAAYLDCQKVGAPPDLLERLTAMAAKLDARPPGRHGPRDPELDQFMEAYCNMLVKYREELTRPIDEAMEFLKRVEAQLDSIAGGGSSSSARLSLADGKSSEGAGSSEDDDMDPSGRENEPPEIDPRAEDKELKYQLLKKYSGYLSSLRQEFSKKKKKGKLPKEARQKLLHWWELHYKWPYPSETEKIALAEATGLDQKQINNWFINQRKRHWKPSEDMPFVMMEGFHPQTAAALYLDGGAFMADGMTTYRLGS*
>AraTha|AT1G62990.1	MQEAALGMMGATVGGDGDTAVVAEQNRQLKGEIATHPMYEQLLAAHVACLRVATPIDQLPIIEAQLSQSHHLLRSYASTAVGYHHDRHELDNFLAQYVMVLCSFKEQLQQHVRVHAVEAVMACREIENNLHSLTGATLGEGSGATMSEDEDDLPMDFSSDNSGVDFSGGHDMTGFGPLLPTESERSLMERVRQELKLELKQGFKSRIEDVREEIMRKRRAGKLPGDTTTVLKNWWQQHCKWPYPTEDDKAKLVEETGLQLKQINNWFINQRKRNWHNNSHSLTSLKSKRKH
>AraTha|AT1G23380.2	MDGMYNFHSAGDYSDKSVLMMSPESLMFPSDYQALLCSSAGENRVSDVFGSDELLSVAVSALSSEAASIAPEIRRNDDNVSLTVIKAKIACHPSYPRLLQAYIDCQKKQVGAPPEIACLLEEIQRESDVYKQEVVPSSCFGADPELDEFMETYCDILVKYKSDLARPFDEATCFLNKIEMQLRNLCTGVESARGVSEDGVISSDEELSGGDHEVAEDGRQRCEDRDLKDRLLRKFGSRISTLKLEFSKKKKKGKLPREARQALLDWWNLHYKWPYPTEGDKIALADATGLDQKQINNWFINQRKRHWKPSENMPFAMMDDSSGSFFTEE
>HupSel|comp70736_c1_seq12_1|KNOX1-2	TIHPLVSNSRNMHSMQSTREGRFSQSSENFIPMQGTYVCSEHDHEQAALYYDSDAMVHARLHECEEQQIVGHTLSYDLEEYFSIPQYHTDLVNPICSESIGLSHHFDNQLDHLGKELGSCYSDASLVANTSSESAENKLIPSQLAESLVGDHMESEIKAAILAHPHYPRLVAAHMNCQKVGASPEVISQIDSKFVDLIRDFHKRQLSPSSNIGANPELDEFMVAYCNLLMNYEHEVNKTYKDAMSFCRKLEQQLSIFSTGSIASGESEERNDGCATSDEDESGCEDLELDPLTEEKEIKEQLMRKYSGYFGSLKQEFMKKKKKGKLPTESRQQLLDWWSNHIKWPYPSEAEKASLAESTGLGQKQINNWFINQRKRHWKPAEEHSMMIIHPNQTSTQGG…
>PopTri|Potri.005G017200.1	MEEFYRFNPTFFSSPDDTVRLENLPVANFTDATTSTATEFHSHASSFLQAGHGHREVTGSDMYDAIKTQIANHPRYPDLVSAHLECQKVGAPPEMVSLLEAIGRGNYKINSFYEIGADPELDEFMESYCEVLRRYKEELSKPFDEAATFLSSIESQLSILCKGTLTKIFDYGSDEPAGTSEEELSCGEVEASESQETTGVSSQEQNLKGMLMRKYSAHLSNLRKEFLKNRKKGKLPKDARTTLLDWWNHHYRWPYPTEEEKAKLSEITGLDQKQINNWFINQRKRHWKPSEDMRFPRMDGVSGDPGTPPNMLWYCW*
>AraTha|AT5G25220.1	MAFHHNHLSQDLSFNHFTDQHQPPPPQPPPPPPQQQQHFQEAPPPNWLNTALLRSSDNNNNFLNLHTATANTTTASSSDSPSSAAAAAAANQWLSRSSSFLQRNNNNNASIVGDGIDDVTGGADTMIQGEMKTGGGENKNDGGGATAADGVVSWQNARHKAEILSHPLYEQLLSAHVACLRIATPVDQLPRIDAQLAQSQHVVAKYSALGAAAQGLVGDDKELDQFMTHYVLLLCSFKEQLQQHVRVHAMEAVMACWEIEQSLQSLTGVSPGEGMGATMSDDEDEQVESDANMFDGGLDVLGFGPLIPTESERSLMERVRQELKHELKQGYKEKIVDIREEILRKRRAGKLPGDTTSVLKAWWQSHSKWPYPTEEDKARLVQETGLQLKQINNWFINQR…
>LycDer|PQTO-2010435|young_leaves_stems	MMKNNKQIPDRVFDTDLQSNYDVCPDEHAQGNTFVAGTSYYCEDMAHARLHDVEDEVEVASLSTFTSLEEYLSMPQYQEELMNPISPECSHVCQHLSTHVHQLGKELSRDCYSEPFLVANSSELIEVQRLNPPQLTSQIIRGAVKEEDEIEAAILSHPHYSSLVAAHMNCHKVGASPEVVSHIDSLIRKFQERQPLTTTSIGVDPELDQFMYTYCNMLLNYQREITRTFEEAMACCQKLETQLNIISTGSIASGESEERNDGGATSDDDDSGCDDLEIDPFAEEKEIKEHLMRKYSGYIGSLKQEFSRKKKKGKLPRESRQQLLNWWSMHIKWPYPSEVEKASLAESTGLDQKQINNWFINQRKRHWNPSDDAVLIAHPSQSNVHSATDGT
>LycDer|PQTO-2083351|young_leaves_stems	MDFENSSQNVSLQQFSELQANTRYSDRSSLGTDQEQFRRIVQKRETKIPDMTQHELQSYSRRSVDGNCELQIQNLNTVEAGDSKDLRACDENRFSALNEPSNIKLGAGPTWLSNASLRAEQSQSCGIETDTSRKWCGCIERSQCMHCTSTPHHTTVNPSPSLPPSTTYAGWLSMPVSGGHSMQQHQGCSTSELVEGVSNEILNKKQFQGSVEQNHSPRQSKAFQVDLQQHTANSHDLVDEEAVENEDHSSIWQNVRRKAEIVSHPLYDQLLTAHVACLRTATPVDQLSKIDAQLAHASHVAAKYSVLVHDHDCQTREDKDELNQFMAQYVMLLHSFKEQLQQHVRVHAMEAVVACWEMEQSLLNLTGVTPGEGTGATMSDDEDEHLDNDVGFYDTGLDG…
>IsoTeg|PKOX-2013942	MVEGGESKPCPAAARRAEAWXQQQQQQQQHQNEQESLMRQMLQQKREGGQIQDLLQCEQRHEEQQQQHHRQEKMPTWLTRSTQQQLQLQDQEGRKWCSCGPGDQCIHCAGLHHAESSPAVPGSGGNNNNNNNYTHWLQGHRGSVESNTAELLVELPHTSALGLSMQHSIDLEAGVGPKASDLIDPSDPADLDDCHRLQNAGLKAEIVSHPLYEQLLEAHVSCLRIATPVDQLPKINGQLANCNHVIAKYSFLANHQILVGNNKDELDQFMAHYVMLLRSFKEQLQHHVRVHAKEAVMACWELEQNLLSLTGVTPGEGSGATMSDDEEDQAENDYWQDNMGFGPLIPTETERTLMERVRQELKLELKQGYRARIVDVREEILRKRRAGKLPGDTTSVLKA…
>SelKra|gi|58011285|gb|AAW62517.1	MELRGRRSTSQSPASTQDSTEVSMEQHLPPPRHPHPQQHEMGAMMVLMEESSNAHHHHLGSTSSMPPHQEQQQNPYRPSAAGEHQQQFFLPGMIKEESSPHHQQQQQNFLLPSSVFSMENICWPTNDQADLMESMSPESADLCRNLSSQLEHFRKEIGTYHGAESSSQQHHLVSSASGSSSGSYGVDKSLSVVPAVSLASDLLGSTSSQSSESEMLRAAIVSHPHYPELVVAHMNCHKVAASPEVVSQIDEIIQNFKDFQPPVAASLGANPELDQFMVAYYSMLLKCEKEVRKTFKEAVAFCKKLDQQFQVITNGSASSVTSVESDDRNEAYDSSEDEDSGAEVEIEVDPMAKDKELKEQLMRKYSGYISSLKHEFLKKKKKGKLPKDSRQILLNWWSV…
>LycDer|PQTO-2081967|young_leaves_stems	MHCSSDMSADDPGIAAVNHMSNSSYNNWLSVPIPAAVQADGAAGELLGEARGGPPVQHAHGSVGLQPLSGSTKRGMEHLPLQAGGNRRQLNDEDALDAHDCMKLQTVGLKADIVSHPLYEQLLEAHVACLRIATPVDHLAKIDGQLVHCHHITAKYSVMENPHVLFGNNKDELDQFMTQYLLLLRSFKERLQHHVCVHAKEAVIACRELEYSLLSLTGASPGEGSGEGMSDEEEEQSECEFWQDDLGFGPLIPSETERTLMERVRQELKHELKQGYRDRIADVREEILRKRRAGKLPGDTTSVLKAWWQAHSKWPYPTEDEKARLVQETGLEMKQINNWFINQRKRNWHHHPASVTASSKAKSKR
>SelKra|gi|58011289|gb|AAW62519.1	MGGDQEQQARQHNNDDREAAAKQMPTWLLSSRQQPPPSAQCDEEAWSSHHHHQQQQASSSSYENPRTTTQGLLQDDDKAEHGLGVGSGDMVEECARMQSAKLKADIVTHPLYEQLLEAHVSCLRIATPVDQLGKIDGQIAQCHQLIAKYYILANHQLLCGNSKDELDQFMAHYVMLLRSFKDQLQHHVRVHAKEAVMACWELEQSLLGLTGVSPGEGSGATMSDDETTEQEQQCESDLWQDNLGFGPLIPTETERTLMERVRQELKHELKHGYRARIVDVRXEILRKRRAGKLPGDTTSVLKAWWHAHSKWPYPTEDEKARLVQETGLELKQINNWFINQRKRNWHHHPSSSASTTSKLKCKS
>SelKra|ZFGK-2006217	MAFNMSHDMSLQQLPELQRQERYGGGNTTTTTSTMDAAAAAGEAKNNAGATTTAESGAAAAASNVEGDDKSPGDDREKLDRGGSGPPNWLNNAVLRQASASAAAAPAAGNYNQQWLASAGNPCDNDLEPPAKGQQSHGSVEVNHSSGQAKGFLELHADTANSGGGNGNGTTTGGDLVEDVEGGVEAKIWHNARLKADIVTHPLYEQLLSAHISCLRTATPVDQLPKIDAQVGHSHQVAAKYALLATDQAGLAKDKDDVNEFMAHYVTLLRSFKEQLQQHVRVHAMEAVVACWELEQSLFTLTGVSPGEGTGATMSEDEDEQADSDSGYYDASIDGHDYTGFGPLIPTETERTLMERVRHELKIELKHGYKAKINDVREEILRKRRAGKLPGDTTSVLKS…
>LycDer|PQTO-2010278|young_leaves_stems	MAFNSLSAMVQSQTLSEALQVGGGEGTENPQGLGIAEKHNGGGGLDEAHVAHIKLAGPAWLSNALLRAEQPQSIEEEAGDGSRKWCTCSEGRVCIHCSSAASNHVSSSSSSSLSCSATYAQWLSMPLSNLQEQQRQPLSAEIVTDELLAKNQFRRSVEVNPAAASEECKSMMGDVPPAYQPATSSDIVDAEAADTDDHSSIWRNVRLKGEIVSHPLYNQLVTAHVECLRTATPVDQLPKIDARLANAGHITAKYGVLVNDHESLNGEDRDELNGFMANYVLLLQSFKDQLQRHVRVHAMEAVIACWKLEQSLLNLTGATPCEGASSTMSDDEDDYVENADFYDPGFDGHDMTGFGSLVPSETERTLMERVRHELKLELKQGYKARINDVREEILRKRRA…
>LycDer|PQTO-2081329|young_leaves_stems	MEMQQFQSMQYSYTEGRISQSSEDFIPPMQGTFQEDDHGQALYYDDVGMVHARFHESNEQQMVGHTLSYDLEEYLSMPHYQAELMNPISPESANLCYNSANQLDPLGTCYSDASLVSNTSEYVEQRLIPSQLADALAGDHMESEIRAAILAHPHYPRLVAAHMNCHKVAASSEVVSQIDDLIREFHERQFSPSSSLGANPELDHFMVSYCNMLMSYEQEVSRTYKDAMSFCRKLEQQLSVFSTGSIASGESEERNDGCATSDEDESGCEDLEIDPLAEEKELKEQLMRRYSGRIGSLKQEFMKKKKKGKLPKESRQQLLDWWSGHIKWPYPSEEEKASLAESTGLGQKQINNWFINQRKRHWRPAEEHSMLIIHPS
>SelKra|gi|58011287|gb|AAW62518.1	MTSAAASSSSKFTAPASTMDEWYMLSSYQSLIDANEGLEHAAGALEHHQQQQSSSSKQKSSLQLSEKEMKAAISGHPQYLELIKAHMSIKKVGASSQKVAEINEVIRMHQDSQPSSVHTNIGANPELDQFMVAYCDVLNMYENQLNKAFTGAIEYCKQQEQELKLVSVSDEPIDALSSVELDDDVEDDEEAESDDVAADGGDIDPLIGDKEIKRALMKKYGGYLGGLTQEYLKKKKKSKLPSAATKTLRDWWFQHLEHPYPSEAQKATLAATTKLDPKQINNWFINQRKRHWDPSAAAASARGESLQQQGSQDGD
>IsoTeg|PKOX-2100696	MLFSNLPQSMSAQQYADLQQGNRYAPERPIETEQMSLRQMLQKREREISEATRCELPNQRSEMNGNCQEIEDGGNKDSDEHKPSIINTAPTWLSNAMLQQAHNAAGASASSTNSYSQWLSMPINAMHHTEGSNPNPDMVENVTISAQQSHGSSGQGKGFLDLHADTANSSDLVDGEAAETDDHNIWQNAKLKAEIVSHPLYEQLLAAHVACLRTATPVDQLSKIDAQLGHSHQVASKYAILNNDQNLLSKDKEELNEFMAHYVTLLRSFKDQLQQHVRVHAMEAVVACWELEQSLMSLTGVSPGEGTGATMSDEEDEHSDSDPGYFDCMDGHDASGFGPLIPTETERTLMERVRHELKLELKQGYRARINDVREEILRKRRAGKLPGDTTSVLKSWWHA…
>SelApo|LGDQ-2003456	MAGGYGSTSKFANMEEWLVSPYEVLIEQAAAEGLTTSPPTLLAPESSSMAAARTAADSRSSSKGELSDCEMRSAISGHPQFKDLVRAHLNCRKVGASSDLAAQMDAQCMKYELEIAVKTTIGADPELDQFMVAYCNVLNACEMELLRTFKEAMEFCKNQEQKLNIITVRNEDVLSSAENEDMDMDASGSSDYMLMEEAESRVVDSLLGDKELKQMLMRKYGTYIKGLTQEYLKKKKKGKLPKESRQQLLDWWAQHQDHPYPNENQKASLAQTTGLEPKQINNWFINQRKRHWNPQAMRGESSQQQNDTKSSS
>SelApo|LGDQ-2004042	MAFNLPHNISLQQLTELQDAVTSTTTTAAGTATTAATAADDKLTGPSSTRARRRGDGAGMDQVDDEGDDDADDEGEEEEEEQEVDEGATRRRRQEQDHDQDDAEERQREEEHQGLEGEGDRNSSLLLLNDGNKSSSQSQQESNKAAGPTWLSNALLARQPSPVAAAVAVAAATGAPNYSQWLSMPQPHGSSTDLGDAAVAAAAAAAAAAVGAHHQLHGDGGGGGEGGGDLVEQQQQDQGGGVESKLWQNARLKADLVTHPLYEQLLSAHISCLRTATPVDQLPKIDAQLAHSSQVAGKYSILAANEQGLSKDKDEVNEFMAHYVTLLRSFKDQLQQHVRVHAMEAVVACWELEQSLFTLTGVSPGEGTGATMSEDEDDQQADSDSGYYEAAGAGLDSSH…
>IsoTeg|PKOX-2098898	MLQQHKRPFSANSAESVEQIHQMEMHPSMSSMMALLNHPQQHANLLPQLYNSGSILLPELQESGVVKGESIFSTFHHDHIFVQGSLQLPPFPHYSSAKELGVEFSDSSISNASDLQPDKRPISSNSVQSENDVMKAAIVSHPHYPQLVAAHMNCRKVGASPEISSQIDEYIQNLHEFQPAATTNCGEDPELDQFMATYYAMIVHYEGEISKTFQQAVAFCKKFEQQLNVITNGSVGSITSGDSLERTEGCDSSEDEDSGMEGEIEVDPMAEEKEIKEQLMRKYSGYISSLKQEFMKKKKKGKLPKEARQLLLEWWRDHSKWPYPSESEKVNLAERTGLDQKQINNWFINQRKRHWKGSEENDTGGGQSSQNTSSPPDMAS
>SelApo|LGDQ-2010944	MGSSSQSAEDAVAVDTSKQQQQQQLGMPTWLNSALSRQTSSASHQQQQQQQQAWSNPSSSSYTNWFSSAAAAAGTSTGVLNNTTSPAAAAAAATAMSETTATTTTTTMPTAELLVEQDRKAAVAAAAMLMGSTVPVMEADVTSHGSIGDPELDECAARYQMNAGLKADIVTHPLYEQLLEAHVACLRIATPVDQLSRIDGQISQCHHAIARYSILANHQLLCGSSKEELDHFMAHYVMLLKSFKDQLQHHVRVHAKEAVMACWELEQSLISLTGAAPGEGTGATMSEDEDDQQQQHQQQQQQQPDNDYWQDNLGFGPLIPTETERTLMERVRQELKHELKQGYRARIVDVREEILRKRRAGKLPGDTTSVLKAWWHAHSKWPYPTEDEKARLVQETGLE…

## Sheet: YABBY
Supplementary Table S1. YABBY amino acid sequences used for the phylogenetic tree in Supplementary fig. S1.
>PinTae|PITA_000023465-RA	MSTSGFEVGSDHLCYVHCDYCNTILAVNVPCNSLYRTVTVRCGHCNNLLSVNMAPLLQSLAQDPQQQGQNTGTYDYNRDPASSSTVIRDASYLENEEARMSSYRQPEKKQRVPSAYNRFIRDEIQRIKAHNPKITHKEAFSAAAKNWAHYPHIHFGMMMDSRRQANSEDGGDVLNAEVCNN
>PopTri|Potri.014G066700.1	MASSSAAFSPDHLSSSDQLCYVHCNFCDTVLAVSVPCSSLFKTVTVRCGHCTNLFSVNMRSLLPAANQFYLGHGFFNPQINILEGMRSTGAPPSLMINQPNPNESVMPIRGVEEIPKPPVVNRPPEKRQRVPSAYNRFIKDEIQRIKAGNPDISHREAFSAAAKNWAHFPHIHFGLMPDQPVKKTNVRQQEGEDVLMKDGFFAPANVGVTPY*
>OrySat|LOC_Os02g42950.1	MSSSSSSSAVFPLDHLAAPSPTEQLCYVHCNCCDTILAVGVPCSSLFKTVTVRCGHCANLLSVNLRGLLLPAPAPAPANQLHFGPSLLSPTSPHGLLDEVAFQTPSLLMEQAASASLSSITGRSSSSCASNAPAMQMPPAKPVQQEPELPKNAPASANRPPEKRQRVPSAYNRFIKDEIQRIKAGNPDISHREAFSAAAKNWAHFPHIHFGLMPDQGFKKTFKPQDGSEDILLKDSLYAAAAAAAAAAANMGVTPF*
>ZeaMay|GRMZM2G005353_P01	MTSPVPETFSLQDQQPPPPPPAEQEQICYVHCSYCDTILAVGVPCSSLFQTVTVRCGHCANLLYVNLRALLLPPATAPAAANHLPPFGQALLSPTSPHGLLDAETMSSSSFQAPSLPSAEPPSAACVSGITSINNTACGGNNAASAMAPPPAKPALHEPPQLPRSAASANKTSEKRQRVPSAYNRFIKDEIQRIKASNPDITHREAFSAAAKNWAHFPHIHFGLMPDQGLKKHPMQTQEGAECMLFKDGLYAAAAAATAASSMGISPF*
>PopTri|Potri.006G067800.1	MSSCIDAVPNEQLCYIPCNFCNIVLAVSVPCSSLFDIVTVRCGHCTNIWSVNMAAAFQSLSWQDQVQASNYNSHDYRIDLGSSSKCNNKISMRTPAANIVTQERVVNRPPEKRQRVPSAYNQFIKEEIQRIKANNPDISHREAFSTAAKNWAHFPHIHFGLMLETNNQTKVDDGSEKRLMSRSALQNN*
>OrySat|LOC_Os10g36420.1	MSSSSSSSASSAAAAAFRPAVVQREQQVVEEKFPAAAAAMREMVLPPVAAAAADSEQEQLCYVHCHYCDTVLVVSVPSSSLFETVTVRCGHCSSLLTVNMRGLLLPTTAAAAPPPPPPPPPPPPPPAAHFPHSLNLAPANPPHHHSLLDEISTANSPTQLLLEQHGLGGLMASAASCRNNNSPAAAAAPPPPTSQGKAAAKEPSPRTNTAVINRPPEKRQRVPSAYNRFIKDEIQRIKAGNPDISHREAFSAAAKNWAHFPHIHFGLMPDHQGLKKTSLLPQDHQRKDGLLKEGLYAAAAAAAAAANMGVAPY*
>AraTha|AT1G08465.1	MSVDFSSERVCYVHCSFCTTILAVSVPYASLFTLVTVRCGHCTNLLSLNIGVSLHQTSAPPIHQDLQPHRQHTTSLVTRKDCASSSRSTNNLSENIDREAPRMPPIRPPEKRQRVPSAYNRFIKEEIQRIKACNPEISHREAFSTAAKNWAHFPHIHFGLKLDGNKKGKQLDQSVAGQKSNGYY
>PopTri|Potri.008G097800.1	MNLEEKASTEVPSSEHLCYVRCNFCNTVLAVGIPCKRLLDTVTVKCGHCNNLSFLSTRPPNQGQCLDQYHRLSLQGVSSNEKFLFKEKQGFCTDIRKGESSSSSTSSEQPVPTVPFVVKPPEKKHRLPSAYNRFMKEEIKRIKAADPEIPHREAFSTAAKNWARARYLPKSGAGSGSPNI*
>PicAbi|MA_10432332g0010	MSASPDCSNIDSASIHSGSVITEGAAMSGCIESSAAEQLCYVHCNFCSTILAVSVPSSSLFNIVTVRCGHCNHLLSVNMMGASPPLEAGQIQNDYSKDSASSSASPTISERTANSYAGNEAVKMFSSIPPEKRQRVPSVYNRFIKEEIQRIKAKNPDIRHKEAFSAAAKNWAHFPHIHFGLMLENNKQAAIDKGNLREGTQIGTVKDGRMTTNLC
>PopTri|Potri.018G129800.1	MSSCVDVVPHEQLCYIPCNFCNIVLAVSVPCSNLFDIVTVRCGHCTNLWSVNMAAAFQSLSWQDHVQASNHISHDYRIDMGSSSKFNNKISTRTPATNIVTQERVVNRPPEKRQRVPSAYNQFIKEEIQRIKANNPEISHREAFSTAAKNWAHFPHIQFGLMLETNNQAKLDDGSDKHLMSRSALLNN*
>OrySat|LOC_Os03g11600.1	MDLVSPSEHLCYVRCTYCNTVLALQVGVPCKRLMDTVTVKCGHCNNLSFLSPRPPMVQPLSPTDHPLGPFQGPCTDCRRNQPLPLVSPTSNEGSPRAPFVVKPPEKKHRLPSAYNRFMREEIQRIKAAKPDIPHREAFSMAAKNWAKCDPRCSSTVSTSNSNPEPRVVAAPIPHQERANEQVVESFDIFKQMERSG*
>ZeaMay|GRMZM2G106204_P01	MSAQFASEHACYVNCNYCNTILVVNVPSSCSYNVVTVKCGHCTMVLSMDLSPFHQQARTVPDNQVVQNRGFQYNNFGSYEQASSRNLRTPPMYPVSNNQPQVPPIRPSEKRQRVPSAYNRFIKEEIQRIKTSNPEISHREAFSAAAKNWAHLPRLHFGLSVADGGGGSN*
>PopTri|Potri.010G042400.1	MSTLNHLFDPPDQICYVQCGFCTTILLVSVPCSSSSTVVTVICGHCSSLLSVNLTKISFLPFNLLTSLSHDQERKELLSPDEVNAQKGLDTQSSFIAISSDNDEDIDKVNPVNRVINKPPEKRQRAPSAYNCFIKEEIRRLKTENPNMAHKEAFSTAAKNWAHCPHVHYKGDGESIGLEEENSTWSSDAAEVNIESKGFHERKVPRHYMWAKTPFE*
>PinTae|PITA_000077218-RA	MLHHCIKASITWKQIQNDYSRDSTLSSASSTVSERIANSYAGNEAAKMFSSMPPEKRQRVPSVYNRFTKEEIQRIKAKNPDIRHKEAFSAAAKNWAHFPHIHFRLMLENNKQATMEKGNLRVTLSLSTFVFFL
>ZeaMay|GRMZM2G529859_P02	MRAQVGVPCSSLFKTVTVRCGHCANLLSVNLRGLLLPPAAPAPPNHLNFAHSLLSPTSPHGLLDELALQQAPSFLMEQASANLSSTMTGRSSNSSCASNLPPPAPMPAAQPVQQEAELPKTAPSVNRPPEKRQRVPSAYNRFIKDEIQRIKAGNPDITHREAFSAAAKNWAHFPHIHFGLMPDQGLKKTFKTHQDGAEDMLLKDDLYAAAAAAAAANMGITPF
>AmbTri|evm_27.model.AmTr_v1.0_scaffold00078.9	MSNCNSSINVTSSPSPSSEHVCYLPCNFCNTILAVSVPCSSLFKVVTVRCGHCTNLLSVNMAAVLHAPSLTPAPANLQHDQLLRNQSLTGSHGYNRMMMMMTTMDSSSTSNNFNHDDINNKVLIPNESIAEKEERTVVNRPPEKRQRVPSAYNRFIKEEIQRIKASNPDISHREAFSTAAKNWAHFPHIHFGLMLDTTKKQPKLDQGSGKHLMNQAAVCIE*
>ZeaMay|GRMZM2G116646_P02	MSSAQIAPADHVCYVHCSFCNTVLAVSVPGNSMLNIVTVRCGHCANLLSVNLRALMHSLPEQDHQLQENIKVHGINGTLHDDHQYCGHLDQLGSSSSSRFRRLPVMCSPQNEQHLLQEQTLNNNARPPEKRQRVPSAYNRFIKEEIRRIKANNPDINHREAFSTAAKNWAHYPNIHFGLDDSGREGKKKLVDHEAAASVVAVAAAPTAAKKIQGFY*
>VitVin|GSVIVT01027648001	MSSSSAFSPDHLSPTSDQLCYVHCNFCDTVLAVSVPCTSLFKTVTVRCGHCTNLLSVNMRGLLLPAANQLHLGHSLFSPHNILEEIRSPPSSMLINQPNPNEAVMPVRGVDEIPKPPVVNRPPEKRQRVPSAYNRFIKDEIQRIKAGNPGISHREAFSAAAKNWAHFPHIHFGLMPDQPVKKANVRQQEGEDMLMKDGFFAPANVGVSPY*
>AmbTri|evm_27.model.AmTr_v1.0_scaffold00004.182	MSLENASEHVCYVQCNLCNTILAVSVPGSCLFTIVTVRCGHCTNLLSMNMGALLQTIPFHDLQNQSVAPQERQRMEDGSSSKSIKDSETIPSENEEPRTIPNRPPEKRQRVPSAYNRFIKEEIQRIKARNPEITHREAFSTAAKNWAHFPHLHYGLSLERNNQVTLDEVLVNEGSQSDPIIHQAVLGLGPLQPYPRQARGRPYKDQGQRS*
>OrySat|LOC_Os03g44710.2	MSAQIVPAPEHVCYVHCNFCNTIFAVSVPSNSMLNIVTVRCGHCTSLLSVNLRGLVQALPAEDHLQDNLKMHNMSFRENYSEYGSSSRYGRVPMMFSKNDTEHMLHVRPPEKRQRVPSAYNRFIKEEIRRIKANNPDISHREAFSTAAKNWAHFPNIHFGLGSHESSKKLDEAIGAPSPQKVQRLY*
>ZeaMay|GRMZM2G074543_P04	MSSSSSSSSSSAATVFPRSPQLPPPVLVENGLTPLHQLTPVAAAAPAAEQLCYVHCYFCDTVLVVPLSCLNLKDFHKLEGVPGTWVQVSVPTSSLFKTVTVRCGHCSSLLTVDMRGLLFPGTPTDTVAGAAPPPAADTSTTTTTITTAPPPANSVNNGQFHLPHSLNHPHHQSLLVDEISSAANPSLQLQLEQHGGLGGLILGGSRNTAAPPPPQPPAAGKGAKEPSPRANPAVNRPPEKRQRVPSAYNRFIKDEIQRIKAGNPNISHREAFSAAAKNWAHFPHIHFGLMPDHQGLKTTSLLPQDHQRKDGLLKEGLYAAAAAAAAHAAANMGIAPY*
>AraTha|AT4G00180.1	MSSMSMSSSSAPAFPPDHFSSTDQLCYVHCSFCDTVLAVSVPPSSLFKTVTVRCGHCSNLLSVTVSMRALLLPSVSNLGHSFLPPPPPPPPPNLLEEMRSGGQNINMNMMMSHHASAHHPNEHLVMATRNGRSVDHLQEMPRPPPANRPPEKRQRVPSAYNRFIKEEIQRIKAGNPDISHREAFSAAAKNWAHFPHIHFGLMADHPPTKKANVRQQEGEDGMMGREGFYGSAANVGVAHN
>PopTri|Potri.016G067300.1	MTIFIRLHACVDVKKQKKESKYLHVSKRVACFLYKLVLLHFPISLYINSSSCHFTFSSQDSLLSGDHHLQFCPRMSLDIASERVCYVHCNFCNTILVVNIPCSANSILLNTVTVRCGRCANLLSLNTGSLLQTSHPQNSHKQNLLYQDLSEGSQSSSSGNKVSALEPSQNEQPGRTVAVHAATGKKQQRSPSAYNRFIKEEIRRIKEKNPEISHREAFSNAAKNWAHLPHTQSGLTLNDTGMDA*
>HupSel|HsYAB	RAYLLQIMSSGSGMMNSPPADEQSSCCDESLVDDRCTKCHVHCGHCHVILTVDVPHNLLDKNSVLVRCGDCRSLISVNIQSLAENQSGLVSRVRKNHEEGGERTNDESSIISSSDPFASSGKSLQSILSSPPAEAVKPPKPKRRNQSSRGDDSSILASRGKKPRTPSAYNMFVRDEILRIKAKDPTVSHKEAFIAAAKNWATQPHINLGTRSEHRDKKIEEKCLNRTV*
>OrySat|LOC_Os07g06620.2	MSVQFTSEHVCYVNCNYCNTILVVNVPNNCSYNIVTVRCGHCTMVLSMDLAPFHQARTVQDHQVQNRGFQGNNFGSYDIASRNQRTSTAMYPMPTSQQQVSPIRPPEKRQRVPSAYNRFIKEEIQRIKTSNPEISHREAFSAAAKNRRRRRRRRRQQLIAAARPAGRPPIAGVHAGARRRPVENARAGGTTTIYYYRVCPSLFAA*
>AraTha|AT2G45190.1	MSMSSMSSPSSAVCSPDHFSPSDHLCYVQCNFCQTILAVNVPYTSLFKTVTVRCGCCTNLLSVNMRSYVLPASNQLQLQLGPHSYFNPQDILEELRDAPSNMNMMMMNQHPTMNDIPSFMDLHQQHEIPKAPPVNRPPEKRQRVPSAYNRFIKEEIQRIKAGNPDISHREAFSAAAKNWAHFPHIHFGLVPDNQPVKKTNMPQQEGEDNMVMKEGFYAPAAANVGVTPY
>PopTri|Potri.009G000100.1	MNLTKMDEGWTNIPFKLYNSSWQVSVPSSSLLNIVTVRCGHCGNLLSVNMGASLQTLPLQDAQKLHLINSEDLNKDSGSSSKPNKVTAFKSAEHEPPRMSPIRPAPEKRQRVPSAYNRFIKEEIHRIKACNPDISHREAFSTAA
>AmbTri|evm_27.model.AmTr_v1.0_scaffold00096.22	MSSCEHIFEFPEQLCYVQCTFCDTILLVSVPCSSMLKMVTVRCGHCNNLLSVNMKLRASFLPLHLISSLTNQVPTLSLSLSQASQELRIDTPINTSSPKKDEITPPKHVNKPPEKRHRAPSAYNRFIKEEIQRLKAREPTITHKEAFSAAAKNWAHFPRIPFNVEADGCTQEEGNGDEVVLMENNE*
>PicAbi|MA_112273g0010	MSTSGFEVGQDHLCYVHCDFCSTILAVNVPCNSLYRIVTVRCGHCTNLLSVNMAPLLQSLPQQAQQQGQNTGTHDYTRDPASSSTAINDAYPDNEETRIPSYRQPEKKQRVPSAYNRFIRDEIQRIKANNPKITHKEAFSAAAKNWAHYPHIHFGLMLDNRRQSNSEDGGDVLNAEVCNN
>ZeaMay|GRMZM2G054795_P01	MMSSAPEETLFNLDQQQPPPAEQEQICYVHCSYCDTILAVGVPCSSLFQTVTVRCGHCSNLLYVNLRALLLPAAAANNQLPPFGQPLLSPTSPHGLLDAEAMSFQAPSLPGAEPPSACVSGVTSINNTCGGNTTTSSAMSSMAPPPAKHALQEAQQLPRTAASVNRTSEKRQRVPSAYNRFIKDEIQRIKASNPDITHREAFSAAAKNWAHFPHIHFGLMPDQGLKKNPMQNQEGAECMLFMDGLYASMGFSPF*
>ZeaMay|GRMZM2G085873_P01	MLNMVTVRCGHCTSLLSVNLRGLIQSLPVVQNHYSQEHFKVQNFSFTENYPEYAAPPSSSRYRMPTMLSAKGDLDHMLHVRAPEKRQRVPSAYNRFIKEEIRRIKANNPDISHREAFSTAAKNWAHFPNIHFGLGPYESSNKLDETIGATGHPRKIQDPY*
>VitVin|GSVIVT01001269001	MSSSSTLSLDHLPPSEQLCYVHCNICDTVLAVSVPCTSLFKTVTVRCGHCTNLLPVNLRGLLLPSANQLHLGHAFFSPSHNLLEEIPNPSPNFLINQTTANDFSVSARGGADELPRPPVINRPPEKRQRVPSAYNRFIKDEIQRIKAGNPDITHREAFSAAAKNWAHFPHIHFGLMPDQTMKKTNVRQQEGEDVLMKDGFFASANVGVSPY*
>ZeaMay|GRMZM2G102218_P01	MCAWGPGIIAGIETLPPSPLVACSTDSSSSSSTSRPVSSPFFVCLCLLVSRLTTQLASRQPDTRCFQISHRTVVVGPSENIPPRPPPRAPPRPRTPAGHQASMDTVSQSEHLCYVRCTYCNTVLAVGVPCKRLMDTVTVKCGHCNNLSYLSPRPPMVQPLSPTDHPLGPFQCQGPCSECRRNQPLPLASPTSTDLTPRMPFVVKPPEKKHRLPSAYNRFMREEIQRIKAAKPDIPHREAFSMAAKNWAKCDPRCSTTASTATSNSAPEPARVVVPTPHVTEPRFDLEDRAKEHVIESFDIFKQIERNI*
>ZeaMay|GRMZM2G141955_P03	MSSAQIAPADHVCYVHCNFCNTVLAVSVPGNSMLSMVTVRCGHCTNLLSVNLRALMHSVPEQDQLQQENIRVHGTLREHHQCGGGHHLELGSSSSSRFRLPMMMSYAPQNEHLLQEQTLNNARPAPEKRQRVPSAYNRFIKEEIRRIKANNPDISHREAFSTAAKNWAHYPNIHFGLNSGREGGKNKLVDEAVAAVAVAPKKIQGFY*
>PopTri|Potri.001G214700.1	MLARVLLKFEANYTFGSIQVISCDNTRRAFLSCFTNSSWQVSVPSSSLFNIVTVRCGHCGNLLSVNMGASLQTLPLQDPQSQKLLLINSEDLNKNFGSSSKCNKVTASESTEHEPPRMPAIRPPEKRQRVPSAYNRFIKEEIQRIKASNPDISHREAFSTAAKNWAHFPHIHFGLKLDSNKHAKLDHQSFAGEGTQKTSGLYEINGSL*
>OrySat|LOC_Os07g38410.1	MSSAARHHCSGLRERLGCVQCSFCATVLLVSVPCSSVLRVVAVQCGHCSGILSAVNLPPSPVSASIELTPQELDAGPPPGEYSDESSGDDREGRDAEDDAPAPAAAAVANKPPGRKQRTPSAYNCFVKEEIKRIKSMEPNITHKQAFSTAAKNWAHLPRIQQKRGRDSC*
>PinTae|PITA_000029248-RA	MSAASPDCSNIDSASIHSGSVITEGAGLISSGAFFFGASAMSGCIDSASATEQLCYVHCNFCSTILAVEDAHHSALLINFVFIQCDAQVSVPSSSLFKIVTVRCGHCNHLLSVNMMGASPPLEAGQIQNDYSRDSASSSASSTVSERTANSYAGNEAAKMFSSMPPEKRQRVPSVYNRFIKEEIQRIKAKNPDIRHKEAFSAAAKNWAHFPHIHFGLMLENNKQATMEKGNLREGTQIGTVKDGRMTTNLC
>ZeaMay|GRMZM2G167824_P01	MSSSSSSSSAATVFPPSPQLPPPLLVENLPPLHQLTPPVAAAAAPASEQLCYVHCHFCDTVLVVSVPTSSLFKTVTVRCGHCSSLLTVNMRGLLFPGTPANTAAAAAAAPPPPPAAAVTSTTATMTTAPPPPPATSVNNNGQFHFIPHSLDLALPIPPHQSLLLDEISSAANPSLQLLEQHGLGGMITSGRNAAAPHPHPPQPQAPAAGKGAKEPSPRANSAINRPPEKRQRVPSAYNRFIKDEIQRIKAGNPDISHREAFSAAAKNWAHFPHIHFGLMPDHQGPKKTSLLPQDHQRSDGGGLLKEGLYAAAANMGVAPY*
>AraTha|AT1G69180.1	MNLEEKPTMTASRASPQAEHLYYVRCSICNTILAVGIPLKRMLDTVTVKCGHCGNLSFLTTTPPLQGHVSLTLQMQSFGGSDYKKGSSSSSSSSTSSDQPPSPSPPFVVKPPEKKQRLPSAYNRFMRDEIQRIKSANPEIPHREAFSAAAKNWAKYIPNSPTSITSGGHNMIHGLGFGEKK
>AmbTri|evm_27.model.AmTr_v1.0_scaffold00047.126	MDFLPGSTDHLCYVRCNFCDTLLAVGVPCRRLMDTVTVKCGHCSHLSFLSARPLLQNQSLELLSTQNFCGDNKKSQQSSSSSPLTPNQQVVPKVPNVVKPPEKKHRLPSAYNRFMKEEIKRIKAGNPEIPHREAFSMAAKNWARFDPQLLHGSTTSTQIEKQVKPNQEIHEMVTAGGRVKQEDMRQLQAAARSQIT*
>AmbTri|evm_27.model.AmTr_v1.0_scaffold00085.9	MSSSSSFAFHPTPSEQLCYVHCNFCDTVLAVSVPCSSLFKMVTVRCGHCTNVLSVDTRGLLHPTAATQLHLGHAFFSPTPHNLLDECSPPSSLLLDHPLMTPSNTGSASTRLQENEALHSPVSRPPEKRQRVPSAYNRFIKEEIQRIKAGNPDITHREAFSTAAKNWAHFPHIHFGLMADQSIKKTNMQDGDDVLITESFFTAANMGVTPY*
>ZeaMay|GRMZM2G088309_P02	MDMVSQSEHLCYVRCTYCNTVLALQVGVPCKRLMDTVTVKCGHCNNLSYLSPRPPMVQPLSPTDHPLGPFQCQGPCNDCRRNQPLPLASPSSTELSPRMPFVVKPPEKKHRLPSAYNRFMREEIQRIKAAKPDIPHREAFSMAAKNWAKCDPRCSTAASTETSNSAPAEPRVVPTPQLTEPRFDLEDRAKGQVIESFDIFKHIERSI*
>AraTha|AT2G26580.1	MANSVMATEQLCYIPCNFCNIILAVNVPCSSLFDIVTVRCGHCTNLWSVNMAAALQSLSRPNFQATNYAVPEYGSSSRSHTKIPSRISTRTITEQRIVNRPPEKRQRVPSAYNQFIKEEIQRIKANNPDISHREAFSTAAKNWAHFPHIHFGLMLESNKQAKIA
>PopTri|Potri.002G145100.1	MSSSSAAFGPDHLSSSEQLCYVHCNFCDTVLAVSVPCTSLYKTVAVRCGHCTNLLSVSMHGLLPAANQFYLGHGFFNPQNILEEIRNGAPPNLLINQPHPNESVIPFRGVEEIPKPPMVNRPPEKRHRVPSAYNRFIKDEIQRIKAGNPDISHREAFSAAAKNWAHFPHIHFGLMPDQPVKKANVRQQEGEDVLMKDEFFAAANVGVTPY*
>PicAbi|MA_407206g0010	MSSCIDLGIGAGHLCYIQCNYCSTVLAVNVPGSSLLEIVPVRCGHCTSLLSVNMGGLFQSSTPQEVEQSFNENNYSPSCPSQENKSCSPSSPKSRENSVISGAESETVKPISTGLIDCGTTEKRQRAPSAYNRFIRAEIQRIKAVNPEISHREAFSAAAKNWAHLGLMLPDNNKRTNANIDQ
>VitVin|GSVIVT01022586001	MSLDIASERVCYVHCNFCNTILAVSVPCTSVFNAVTIRCGHCANLLSVNMGALLQTVPLHDLQKENLLFQASSKECGSSSKFHKVAAMDSSDNEQPRMLPKGAAQEKKQRVPSAYNRFIKEEIQRIKANNPDISHKEAFSTAAKNWAHFPHIHFGLTLNNSKSDKANFDEAFSGEGPRKTQGFY*
>PopTri|Potri.008G189000.1	MSTLNHLFDLPDQICYVQCGFCTTILLVSVPCSSLSTVVTVICGHCTSLFSVNMKKFSFLPFNRSTSLSYEDEQKEQLRPEFNAQKGLEMQNSFMAISSNNDEDDRINQVNRVINKPPEKRQRGPSAYNRFIKEEIRRIKTENPRIAHKEAFSTAAKNWAHSPLVQYCKDIDGESSGLEEENGSWSCDAADQFQVNVESKGLHERKVPRHFMWAKTPFE*
>ZeaMay|GRMZM2G074124_P05	MSSAPLQIAPVPEHVCYVHCNFCNTILAVSVPSHSMLNIVTVRCGHCTSLLSVNLRGLIQSLPVQNHHYSQQQENFTVQNMGFTENYPEYAPSYRMPTTLSAKGDLDHMLHVRAPEKRQRVPSAYNRFIKEEIRRIKACNPDISHREAFSTAAKNWAHFPNIHFGLGPCESSNNLDEATGAMCHPQKVQDLY*
>VitVin|GSVIVT01012246001	MDLVPPSEHLCYVRCNFCNTVLAVGIPCKRLLDTVTVKCGHCSNLSFLSTRPPLQGQCLDHQMSLQGVCNDFRKGQSSSSSSSTSSEPVSPKAPFVVKPPEKKHRLPSAYNRFMKEEIQRIKVANPEIPHREAFSAAAKNWARYIPNSPAGSVSESSNNE*
>PopTri|Potri.003G112800.1	MSSSSTLSLDLLPSSEQLCYVHCNICDTVLAVSVPCTSLFKTVTVRCGHCTNLLPVNMRGLLLPSANQFHLGHSFFSPSHNLLDEIPNPTPNFLINQTNVNDFSVPVRGMADHELPRPPVINRPPEKRQRVPSAYNRFIKDEIQRIKAGNPDISHREAFSAAAKNWAHFPHIHFGLMPDQMVKKTNVRQQEGEDVLMKDGFFSSANAGVPTPY*
>ZeaMay|GRMZM2G046829_P01	MSSSSSPRHPCFGAALPERLGYVQCKFCATILLVGVPIGGSLQLLKTVAVQCGSCCGILSVALPPDEAPAPASVELLPLMQEAGGVDPPPRDSDESSGEDRGETTEAATVADNHAAFPAVNKPPLRKQRTPSAYNCFIKEEIQRIKARDPGITHKEAFSAASKNWAHLPRIQKTGG*
>VitVin|GSVIVT01013778001	MSTLNHLFDLQEQICYVQCGFCTTILLVSVPYSSLSMVVTVRCGHCASLLSVNMMKASFVPLHLLASLSQDEPKEGCPNEEGAQKASDKRSPSMVASSDNEEDDIVPVHHVVNKPPEKRQRAPSAYNRFIKEEIRRLKAENPKMTHKEAFSTAAKNWAHFPAIQLKGAGESCSQER*
>OrySat|LOC_Os12g42610.1	MSAQIAPAEQVCYVHCNFCNTILAVSVPGNSMLNIVTVRCGHCTNLLSVNLRGLMHSAPALQDHHHHHLQESGLSGCFRDQSGYPEFGFSAASSSSKLRLPPAAAAMVSYSQQNQQLEQALHARPPEKRQRVPSAYNRFIKEEIRRIKANNPDISHREAFSTAAKNWAHYPNIHFGLSPGHEGGKKLVDVDPIPTAPSSKKIQGFYS*
>VitVin|GSVIVT01037533001	MSLDITPERVCYVHCNFCNTILAVSVPCTSLFTIVTVRCGHCANLLSVNMGALLQTVPTQDLQSQKQQLSCGDPSEDCGSSSKCNKFSAFESAEHEQPRMPPIRPPEKRQRVPSAYNRFIKEEIQRIKASNPDITHREAFSTAAKNWAHFPHIHFGLKLDGNKQGKLDQAFAGEGPHKAHGFY*
>PopTri|Potri.001G120200.1	MSSSSSLSLDHLPPSEQLCYVHCNICDTVLAVSVPCTSLFKTVTVRCGHCTNLLPVNMRGLFLPSASQFPLGHNLYSPSHNLLDDQIPNPTPNFLINQTHVNDFSVTVRGMADHELPRPPVIHRPPEKRQRVPSAYNRFIKDEIQRIKAGNPDISHREAFSAAAKNWAHFPHIHFGLMPDQAMKKNNVRQQEGEDVLINDGFFASSNVGVTTPY*
>VitVin|GSVIVT01015567001	MSSCIDVASEQLCYIPCNFCNIVLAVSVPCSSLFDIVTVRCGHCTNLWSVNMAAAFQSLSWQDVQAPNYTSPDYRIDLGSSSKCNTKMAMRAPASNISEERIVNRPPEKRQRVPSAYNQFIKEEIQRIKANNPDISHREAFSTAAKNWAHFPHIHFGLMLETNNQPKLDEGSEKHLMSKAALRNK*
>OrySat|LOC_Os04g45330.1	MMSSAPETFSLDHLSQHQQQQPPPLAEQEQLCYVHCNFCDTILAVGVPCSSLFKTVTVRCGHCANLLSVNLRGLLLPAAASTANQLPFGQALLSPTSPHGLLDEVPSFQAPASLMTEQASPNVSSITSSNSSCANNAPATSMASAANKATQREPQQPKNAPSANRTSEKRQRVPSAYNRFIKDEIQRIKASNPDITHREAFSAAAKNWAHFPHIHFGLMPDQGLKKTGIQSQDGAGECMLFKDGLYAAAAAAAAATAASSMGVTPF*
>AraTha|AT1G23420.1	MTKLPNMTTTLNHLFDLPGQICHVQCGFCTTILLVSVPFTSLSMVVTVRCGHCTSLLSVNLMKASFIPLHLLASLSHLDETGKEEVAATDGVEEEAWKVNQEKENSPTTLVSSSDNEDEDVSRVYQVVNKPPEKRQRAPSAYNCFIKEEIRRLKAQNPSMAHKEAFSLAAKNWAHFPPAHNKRAASDQCFCEEDNNAILPCNVFEDHEESNNGFRERKAQRHSIWGKSPFE
